# Supplementary material for: Tissue-resident macrophages promote extracellular matrix homeostasis in the mammary gland stroma of nulliparous mice
Source: eLife journal article supplement (doi:10.7554/elife.57438), 2020-06-01
Supplement: supp [file elife-57438-supp-v1.zip]

Archive with 16 entries (16 files):
- elife_poa_e57438_Supplementary_file_1.xlsx
- elife_poa_e57438_Supplementary_file_2.xlsx
- elife_poa_e57438_Supplementary_file_3.xlsx
- elife_poa_e57438_Supplementary_file_4.xlsx
- elife_poa_e57438_Figure_1_figure_supplement_1.pdf
- elife_poa_e57438_Figure_1_figure_supplement_2.pdf
- elife_poa_e57438_Figure_2_figure_supplement_1.pdf
- elife_poa_e57438_Figure_3_figure_supplement_1.pdf
- elife_poa_e57438_Figure_5_figure_supplement_1.pdf
- elife_poa_e57438_Figure_6_figure_supplement_1.pdf
- elife_poa_e57438_Transparent_Reporting_File.docx
- elife_poa_e57438_Figure_1_source_data_1.xlsx
- elife_poa_e57438_Figure_3_source_data_1.xlsx
- elife_poa_e57438_Figure_4_source_data_1.xlsx
- elife_poa_e57438_Figure_5_source_data_1.xlsx
- elife_poa_e57438_Figure_6_source_data_1.xlsx
