# Supplementary material for: Tissue-resident macrophages promote extracellular matrix homeostasis in the mammary gland stroma of nulliparous mice
Source: eLife journal article supplement (doi:10.7554/elife.57438), 2020-06-01
Supplement: supp [file elife-57438-supp-v1.zip › elife_poa_e57438_Figure_1_source_data_1.xlsx]

## Sheet: Fig1
Figure 1A				Figure 1B
%CD45- of Single/Live/Lyve-1+ Cells	%CD45+ of Single/Live/Lyve-1+ Cells			%Lyve-1- of Single/Live/CD45+/CD11b+/F480+ Cells	%Lyve-1+ of Single/Live/CD45+/CD11b+/F480+ Cells
51.2	47.3			67.4	29.2
57.9	40.6			68.3	28
38.3	60.2			75.2	22
50.8	47.7			60.8	35.8
