# Supplementary material for: Tissue-resident macrophages promote extracellular matrix homeostasis in the mammary gland stroma of nulliparous mice
Source: eLife journal article supplement (doi:10.7554/elife.57438), 2020-06-01
Supplement: supp [file elife-57438-supp-v1.zip › elife_poa_e57438_Figure_3_source_data_1.xlsx]

## Sheet: Fig3
Figure 3B						Figure 3F				Figure 3G
%CD206+ of Single/Live/CD45+/CD11b+/F480+/Lyve-1+ Cells	%CD206- of Single/Live/CD45+/CD11b+/F480+/Lyve-1+ Cells	%Lyve-1+ of Single/Live/CD45+/CD11b+/F480+/CD206+ Cells	%Lyve-1- of Single/Live/CD45+/CD11b+/F480+/CD206+ Cells			%CD206+ of Single/Live/CD45+/CD11b+/F480hi Cells	%CD206+ of Single/Live/CD45+/CD11b+/F480int Cells			%F480hi of Single/Live/CD45+/CD11b+/F480+/Lyve-1+ Cells	%F480int of Single/Live/CD45+/CD11b+/F480+/Lyve-1+ Cells	%F480hi of Single/Live/CD45+/CD11b+/F480+/Lyve-1- Cells	%F480int of Single/Live/CD45+/CD11b+/F480+/Lyve-1- Cells
92.2	7.8	44.8	55.2			91.1	33.2			83.3	13.1	28.6	67.8
92.3	7.7	40	60			91.6	34.1			83.2	14.2	31	64.7
89.8	10.2	35.5	64.5			96.5	35.9			74.7	22.7	17.4	77.1
91.4	8.6	61.7	38.3			97	23.9			69	24.5	9.33	85.3
