# Supplementary material for: Tissue-resident macrophages promote extracellular matrix homeostasis in the mammary gland stroma of nulliparous mice
Source: eLife journal article supplement (doi:10.7554/elife.57438), 2020-06-01
Supplement: supp [file elife-57438-supp-v1.zip › elife_poa_e57438_Figure_4_source_data_1.xlsx]

## Sheet: Fig4
Figure 4B						Figure 4C
%CD45.1+ of Blood Single/Live/PanCD45+/Ly6G+/CD11b+/CD64+	%CD45.2+ of Blood Single/Live/PanCD45+/Ly6G+/CD11b+/CD64+	%CD45.1+ of Mammary Gland Single/Live/PanCD45+/CD11b+/F480+	%CD45.2+ of Mammary Gland Single/Live/PanCD45+/CD11b+/F480+			%CD45.1+ of Single/Live/PanCD45+/CD11b+/F480+/Lyve-1- Cells	%CD45.2+ of Single/Live/PanCD45+/CD11b+/F480+/Lyve-1- Cells	%CD45.1+ of Single/Live/PanCD45+/CD11b+/F480+/Lyve-1+ Cells	%CD45.2+ of Single/Live/PanCD45+/CD11b+/F480+/Lyve-1+ Cells
96	3.89	37.5	59.4			51.4	48.6	17.4	73.9
95	4.9	34.5	65.5			50	50	27.8	72.2
90.5	9.39	26.3	69.7			33.7	65.2	14	76.3
97.7	2.19	20.3	77.2			24.7	75.3	12.7	80
94.7	4.94	53.9	40.3			64.7	32.2	34.2	54.8
98.5	1.55	9.83	87			23.1	75.2	4.45	93.2
94.5	5.54	10.9	85.8			26.9	70.9	4.52	93
95.1	4.76	10.2	85.5			27.8	69.8	3.91	92.7
97	2.77	9.56	87			22.6	74.8	4.08	93.5
99	0.78	15	80.4			37.3	60.7	5.6	90.9
91.6	8.06	10.6	82.4			23.6	73.9	4.25	89.7
91.6	8.36	8.24	89.2			19.4	79	2.29	96
96.4	3.6	16.2	80.2			30.4	67.4	5.45	91.8
98.3	1.62	34.7	64.4			42	57.4	17.5	81.1
89.9	9.97	24.2	74.9			31.5	67.8	13.4	85.3
98.7	1.14	42.6	55.5			51.3	47.3	28.5	69
97.9	1.85	30.9	67.2			38.2	60.5	19.1	78.1
99.5	0.42	37	62			41.2	58.3	23.9	74
97.5	2.41	33	65.3			34.8	63.8	25.8	72.2
98.4	1.42	31.6	66.7			37.6	61.4	19.4	77.2
99	0.94	34.7	64.1			39	60.1	28.1	70.9
98.3	1.23	42.5	55.4			50.3	48	18.5	78.6
94.3	5.59	35.5	62.9			42.4	56.1	20.6	77.4
