# Supplementary material for: Tissue-resident macrophages promote extracellular matrix homeostasis in the mammary gland stroma of nulliparous mice
Source: eLife journal article supplement (doi:10.7554/elife.57438), 2020-06-01
Supplement: supp [file elife-57438-supp-v1.zip › elife_poa_e57438_Figure_5_source_data_1.xlsx]

## Sheet: Fig5
Figure 5C
%HA assoicated of Lyve-1+ cells in capsule	%Not HA assoicated of Lyve-1+ cells in capsule	%HA assoicated of Lyve-1+ cells in stroma	%Not HA assoicated of Lyve-1+ cells in stroma
83	15	8	2
75	25	65	35
79	21	85	15
92	8	86	14
92	8	88	12
86	14	93	7
