# Supplementary material for: Tissue-resident macrophages promote extracellular matrix homeostasis in the mammary gland stroma of nulliparous mice
Source: eLife journal article supplement (doi:10.7554/elife.57438), 2020-06-01
Supplement: supp [file elife-57438-supp-v1.zip › elife_poa_e57438_Figure_6_source_data_1.xlsx]

## Sheet: Fig6
Figure 6A
DMSO-Treated Single/Live/CD45+/CD11b+/F480+ Cell Count	Pexidartinib-Treated Single/Live/CD45+/CD11b+/F480+ Cell Count			DMSO-Treated Single/Live/CD45+/CD11b+/F480+/Lyve-1- Cell Count	Pexidartinib-Treated Single/Live/CD45+/CD11b+/F480+/Lyve-1- Cell Count	DMSO-Treated Single/Live/CD45+/CD11b+/F480+/Lyve-1+ Cell Count	Pexidartinib-Treated Single/Live/CD45+/CD11b+/F480+/Lyve-1+ Cell Count			DMSO-Treated Single/Live/CD45+/CD11b+/F480+/Lyve-1- Fold Change to Solvent Lyve-1-	Pexidartinib-Treated Single/Live/CD45+/CD11b+/F480+/Lyve-1- Fold Change to Solvent Lyve-1-	DMSO-Treated Single/Live/CD45+/CD11b+/F480+/Lyve-1- Fold Change to Solvent Lyve-1+	Pexidartinib-Treated Single/Live/CD45+/CD11b+/F480+/Lyve-1- Fold Change to Solvent Lyve-1+
105418	47208			40242	13774	55253	29761			1.05406	0.779533	0.74132	0.184803
118917	32200			39794	10781	67908	18600			1.04233	0.487192	0.91111	0.144647
124627	53937			35870	16065	76690	33641			0.939546	0.881162	1.02894	0.215541
147519	55992			36806	23175	98282	27619			0.964063	0.723427	1.31863	0.310935
Figure 6C						Figure 6D
HA deposition (% of area) (pooled)			Collagen deposition (% of area)
DMSO-Treated	Pexidartinib		DMSO	Pexidartinib		DMSO-Treated mg of HA/g of tissue	Pexidartinib-Treated mg of HA/g of tissue
7.63333	13.0667		2.47	9.2		41.3729	199.401
7.4	17.4		3.84	7		82.5344	162.056
6.86667	15.3333		3.57	8.13		74.0444	143.936
5.23333	14.4		3.5	8.22		41.8764	230.993
10.1	15.7		3.15	9.2			270.576
