# Supplementary material for: Tissue-resident macrophages promote extracellular matrix homeostasis in the mammary gland stroma of nulliparous mice
Source: eLife journal article supplement (doi:10.7554/elife.57438), 2020-06-01
Supplement: supp [file elife-57438-supp-v1.zip › elife_poa_e57438_Supplementary_file_1.xlsx]

## Sheet: Supplemental Table 1 155 gene l
Supplementary File 1: List of 155 differentially expressed genes in CD45+CD11b+F4/80+Lyve-1- and CD45+CD11b+F4/80+Lyve-1+ bulk RNA-seq analysis.
baseMean	log2FoldChange	lfcSE	stat	pvalue	padj	gene
47.9247	8.85757	2.17758	4.06763	4.75e-05	0.00426313	Rgn
6597.88	7.86824	0.816438	9.63728	5.56e-22	2.1e-18	Lyve1
2374.31	5.6061	0.558171	10.0437	9.79e-24	7.38e-20	Fcna
974.29	5.48528	0.515247	10.6459	1.82e-26	2.75e-22	Cd209g
1330.05	4.04707	0.480571	8.42138	3.72e-17	8.02e-14	Cd209b
1210.91	3.98107	0.560072	7.10814	1.18e-12	1.61e-09	Dnm1
2835.37	3.94845	0.479276	8.23836	1.75e-16	3.29e-13	Cd209f
3607.75	3.73672	0.427335	8.74424	2.25e-18	6.77e-15	Ednrb
921.485	3.54515	0.597923	5.9291	3.05e-09	1.31e-06	Enpep
1836.26	3.52266	0.405914	8.67834	4.02e-18	1.01e-14	Folr2
532.22	3.5052	0.682639	5.13478	2.82e-07	4.95e-05	Cd209d
2551.49	3.5026	0.439663	7.96655	1.63e-15	2.68e-12	Hal
353.273	3.31536	0.532846	6.22199	4.91e-10	3.36e-07	Gbp6
400.932	3.22136	0.652353	4.93806	7.89e-07	0.000121417	Pdgfc
382.944	3.18794	0.803348	3.96832	7.24e-05	0.00616663	C6
4760.02	3.13644	0.442186	7.09303	1.31e-12	1.65e-09	C4b
2499.15	3.12137	0.318348	9.80488	1.07e-22	5.39e-19	Colec12
441.676	3.09363	0.795778	3.88755	0.000101261	0.00816584	Nxpe5
1003.99	3.08009	0.45803	6.72464	1.76e-11	1.66e-08	Rcn3
435.505	2.87947	0.567628	5.07281	3.92e-07	6.57e-05	Slc40a1
457.858	2.84492	0.609448	4.66802	3.04e-06	0.000409467	Gprc5c
140.122	2.83912	0.685406	4.14225	3.44e-05	0.00326178	1700020I14Rik
372.752	2.77703	0.590274	4.70464	2.54e-06	0.000355101	Calml4
571.593	2.753	0.486102	5.66342	1.48e-08	3.93e-06	Dennd2a
725.912	2.6837	0.533574	5.02968	4.91e-07	7.97e-05	Pla2g2d
1072.23	2.67705	0.401105	6.67419	2.49e-11	2.21e-08	Tfrc
1379.28	2.6763	0.379211	7.05754	1.69e-12	1.97e-09	Plekhg5
2686.26	2.57877	0.396114	6.51018	7.51e-11	5.96e-08	Cbr2
3443.12	2.49779	0.447994	5.57551	2.47e-08	5.9e-06	Gas6
3228	2.45516	0.39128	6.27469	3.5e-10	2.52e-07	Fcgrt
1482.4	2.44306	0.372051	6.56646	5.15e-11	4.32e-08	Igf1
7433.81	2.42594	0.358215	6.77229	1.27e-11	1.27e-08	Cd163
1674.04	2.37036	0.344828	6.87404	6.24e-12	6.72e-09	Tcn2
355.252	2.36676	0.574093	4.1226	3.75e-05	0.00348716	Ddr2
348.803	2.29144	0.580556	3.94697	7.91e-05	0.00663066	Cped1
1298.56	2.21491	0.513488	4.31345	1.61e-05	0.00171896	Tmem8
796.227	2.21237	0.565626	3.91136	9.18e-05	0.00752169	Ccl8
472.775	2.21157	0.533813	4.14297	3.43e-05	0.00326178	Steap4
3917.04	2.17074	0.440355	4.92954	8.24e-07	0.000125553	Col1a2
872.226	2.16622	0.502894	4.30751	1.65e-05	0.00175335	Kank2
502.17	2.14913	0.495788	4.33478	1.46e-05	0.0015829	Fam43a
1553.56	2.12544	0.421072	5.04768	4.47e-07	7.41e-05	Ddx60
693.802	2.11321	0.448126	4.71566	2.41e-06	0.000342749	Uaca
1007.57	2.0833	0.479769	4.3423	1.41e-05	0.00155205	Col5a2
801.187	2.08292	0.47215	4.41157	1.03e-05	0.00117237	Egfr
4110.95	2.02231	0.396879	5.09553	3.48e-07	5.96e-05	Timp2
1284.09	2.01659	0.407329	4.95076	7.39e-07	0.000114927	Epb4.1l1
5922.21	2.01242	0.314973	6.38918	1.67e-10	1.26e-07	Cfh
548.143	1.98052	0.509105	3.89019	0.000100165	0.00812092	Gja1
3445.83	1.97858	0.343559	5.75908	8.46e-09	2.66e-06	Tns1
2435.06	1.97846	0.341268	5.79737	6.74e-09	2.21e-06	Timd4
672.57	1.9761	0.477439	4.13896	3.49e-05	0.00326774	Agtrap
2794.04	1.93912	0.366789	5.28676	1.25e-07	2.35e-05	Frmd4b
27930	1.93168	0.321107	6.01568	1.79e-09	8.71e-07	F13a1
644.224	1.85658	0.472346	3.93054	8.48e-05	0.00706127	Nr1d1
5395.46	1.85204	0.484066	3.82601	0.000130239	0.00992237	Col1a1
1056.58	1.80705	0.440476	4.1025	4.09e-05	0.00378122	C1qtnf1
3025.94	1.76996	0.364348	4.85789	1.19e-06	0.000175407	Mtss1
1840.03	1.74522	0.390943	4.46412	8.04e-06	0.000954635	Slco2b1
2882.93	1.74376	0.392944	4.43768	9.09e-06	0.0010468	Serpinb6a
1943.58	1.73864	0.40581	4.28436	1.83e-05	0.00190595	Rab11fip5
1035.36	1.73799	0.339712	5.11607	3.12e-07	5.41e-05	Pdxdc1
5517.61	1.72862	0.348212	4.96429	6.9e-07	0.000108313	Itsn1
1336.82	1.72343	0.380703	4.52698	5.98e-06	0.000758206	Ifi27l2a
886.108	1.69859	0.433945	3.91429	9.07e-05	0.00751275	Cebpd
4993.97	1.68404	0.334575	5.03337	4.82e-07	7.9e-05	Snx2
13357.4	1.66364	0.428734	3.88036	0.000104302	0.00836633	Col3a1
1311.56	1.65655	0.382348	4.33257	1.47e-05	0.00158749	Rnase4
4826.59	1.61988	0.347433	4.66242	3.13e-06	0.000417051	C1qa
3581.33	1.61346	0.384481	4.19645	2.71e-05	0.0026899	C1qc
3489.96	1.56838	0.373661	4.19734	2.7e-05	0.0026899	Igfbp4
2453.36	1.55693	0.40513	3.84302	0.000121528	0.009545	Sparc
2861.9	1.53304	0.313818	4.88513	1.03e-06	0.000155865	Sulf2
2407.98	1.50238	0.335753	4.47465	7.65e-06	0.000923324	Ctsl
739.77	1.50082	0.368061	4.07765	4.55e-05	0.00415779	Plcb3
4435.29	1.49971	0.308528	4.86084	1.17e-06	0.000174523	Nrp1
2806.39	1.49636	0.289514	5.16851	2.36e-07	4.19e-05	Rhob
25966.8	1.49229	0.275974	5.40736	6.4e-08	1.24e-05	Sepp1
1161.98	1.47452	0.362205	4.07096	4.68e-05	0.00425331	Cenpb
751.714	1.47406	0.339826	4.3377	1.44e-05	0.00157337	Rxra
5434.69	1.42797	0.317232	4.50136	6.75e-06	0.000827817	Ly6e
7399.29	1.40357	0.309629	4.53308	5.81e-06	0.000742874	Hmox1
89646.9	1.39292	0.256602	5.42834	5.69e-08	1.12e-05	Apoe
1487.19	1.37891	0.35916	3.83925	0.000123411	0.00956104	Ncoa4
1317.87	1.31187	0.32247	4.06818	4.74e-05	0.00426313	Lrp6
8171.38	1.31069	0.310565	4.22033	2.44e-05	0.00245241	Grn
6491.21	1.26344	0.304057	4.15528	3.25e-05	0.00317628	C1qb
32702.6	1.16948	0.27516	4.25017	2.14e-05	0.00217652	Mrc1
5663.83	-1.11247	0.278356	-3.99656	6.43e-05	0.00559727	Pik3r5
1803.16	-1.1503	0.298591	-3.85241	0.000116959	0.00923427	Csf2rb2
5398.11	-1.15769	0.220085	-5.26018	1.44e-07	2.65e-05	Rps24
6217.75	-1.19125	0.286862	-4.1527	3.29e-05	0.00317628	Pde4b
2112.85	-1.20186	0.27529	-4.36579	1.27e-05	0.00142545	Arl4c
2972.5	-1.23937	0.302714	-4.09421	4.24e-05	0.00389516	Svil
68874.8	-1.2598	0.30434	-4.13946	3.48e-05	0.00326774	Cd74
3178.73	-1.26299	0.31611	-3.9954	6.46e-05	0.00559727	Id2
6418.41	-1.28076	0.320936	-3.99069	6.59e-05	0.00567709	Csf2rb
7983.93	-1.3162	0.336401	-3.91259	9.13e-05	0.00752169	Dennd4a
2188.55	-1.34235	0.286469	-4.68585	2.79e-06	0.000382217	Trerf1
1826.99	-1.36105	0.309601	-4.39613	1.1e-05	0.00124944	Syngr2
1054.69	-1.37891	0.356358	-3.86946	0.000109076	0.00865719	Cbfa2t3
1164.29	-1.40847	0.356345	-3.95254	7.73e-05	0.00651442	Fnbp1l
3715.64	-1.44482	0.376495	-3.83755	0.000124268	0.00956104	Samsn1
2041.8	-1.46267	0.312648	-4.67833	2.89e-06	0.000392921	Paxbp1
1553.59	-1.46629	0.324911	-4.51289	6.4e-06	0.000797006	Kif21b
15820.6	-1.47203	0.330326	-4.45629	8.34e-06	0.000974819	H2-Ab1
1345.75	-1.56424	0.340722	-4.59097	4.41e-06	0.000573555	Dusp5
5057.04	-1.58306	0.351592	-4.50254	6.71e-06	0.000827817	Rab11fip1
11984.3	-1.58985	0.382789	-4.15333	3.28e-05	0.00317628	Il1b
4333.53	-1.59529	0.342784	-4.65391	3.26e-06	0.000430833	Cxcl16
5258.68	-1.59683	0.336303	-4.74819	2.05e-06	0.000297609	Nr4a3
1183.84	-1.6366	0.326908	-5.0063	5.55e-07	8.81e-05	Map3k14
1101.88	-1.92571	0.415672	-4.63276	3.61e-06	0.00047314	Net1
1377.08	-1.94141	0.340861	-5.69559	1.23e-08	3.57e-06	Tbc1d8
478.39	-1.99585	0.520073	-3.83763	0.000124228	0.00956104	Grasp
376.951	-2.08268	0.516381	-4.03323	5.5e-05	0.00490912	Slc2a3
2681.86	-2.21372	0.368875	-6.00127	1.96e-09	9.12e-07	Basp1
602.136	-2.21611	0.47066	-4.70852	2.5e-06	0.000351665	Icosl
1532.88	-2.2584	0.434248	-5.20072	1.99e-07	3.56e-05	Flrt3
718.349	-2.25942	0.477362	-4.73314	2.21e-06	0.000317495	Fam46c
851.725	-2.28279	0.486774	-4.68963	2.74e-06	0.000378664	Slc7a11
301.798	-2.32712	0.586973	-3.96461	7.35e-05	0.00622818	Mmp25
775.075	-2.34275	0.387065	-6.0526	1.43e-09	7.41e-07	Bcl2a1b
2642.6	-2.38027	0.417939	-5.69526	1.23e-08	3.57e-06	Syne1
299.445	-2.39574	0.539561	-4.44016	8.99e-06	0.00104273	Rasal3
781.246	-2.43263	0.607117	-4.00685	6.15e-05	0.00542644	Sema7a
1485.5	-2.44836	0.46281	-5.29022	1.22e-07	2.33e-05	Serpinb9
526.464	-2.49047	0.625251	-3.98315	6.8e-05	0.00582714	Adcy6
2327.49	-2.62018	0.587217	-4.46204	8.12e-06	0.000956442	Ccr7
211.245	-2.84185	0.662997	-4.28638	1.82e-05	0.00190187	Osbpl3
561.325	-2.84628	0.637171	-4.46706	7.93e-06	0.000949097	Synpo2
849.885	-2.85331	0.745782	-3.82593	0.00013028	0.00992237	Cacnb3
2077.66	-2.89599	0.603547	-4.79827	1.6e-06	0.000234308	Fscn1
199.22	-2.93747	0.674165	-4.3572	1.32e-05	0.00147155	Klri1
592.777	-3.18932	0.768407	-4.15055	3.32e-05	0.00318572	Serpinb2
479.953	-3.31894	0.628292	-5.28248	1.27e-07	2.37e-05	Dcstamp
74.4708	-3.75857	0.964092	-3.89856	9.68e-05	0.00788781	Dmkn
181.276	-3.81264	0.750444	-5.08051	3.76e-07	6.38e-05	Pla2g4f
149.26	-3.83299	0.99776	-3.84159	0.000122238	0.00955102	Slamf1
675.88	-3.93146	0.696269	-5.64646	1.64e-08	4.26e-06	Serpinb6b
264.753	-4.05777	0.774392	-5.23995	1.61e-07	2.92e-05	Siglecg
100.583	-4.29909	1.07598	-3.99551	6.46e-05	0.00559727	Adam11
154.798	-4.45784	1.07282	-4.15525	3.25e-05	0.00317628	Nudt17
128.009	-4.82502	1.06191	-4.54373	5.53e-06	0.000712347	Glyctk
238.696	-4.98001	1.14555	-4.34725	1.38e-05	0.00152859	Slco5a1
136.846	-5.26354	1.36018	-3.86975	0.000108949	0.00865719	Dusp14
110.162	-5.64322	1.12393	-5.02096	5.14e-07	8.25e-05	Dscam
270.896	-5.76367	0.724434	-7.9561	1.78e-15	2.68e-12	Spata31d1b
88.0424	-5.80118	1.36961	-4.23564	2.28e-05	0.00230652	1300017J02Rik
50.3531	-5.86657	1.37842	-4.25602	2.08e-05	0.00213482	Lrrc3
162.618	-6.43832	1.07339	-5.99812	2e-09	9.12e-07	Ahcy
32.9173	-8.7642	2.04338	-4.28907	1.79e-05	0.00189206	Ugt2b1
42.9441	-9.14967	2.02203	-4.525	6.04e-06	0.000758974	Cyp2c50
49.9902	-9.36851	2.09039	-4.48171	7.4e-06	0.000900528	Cyp2a5
50.3616	-9.37734	2.3272	-4.02946	5.59e-05	0.00495919	Serpina11
