# Supplementary material for: Tissue-resident macrophages promote extracellular matrix homeostasis in the mammary gland stroma of nulliparous mice
Source: eLife journal article supplement (doi:10.7554/elife.57438), 2020-06-01
Supplement: supp [file elife-57438-supp-v1.zip › elife_poa_e57438_Supplementary_file_2.xlsx]

## Sheet: Supplemental Table 2 top 100 ge
Supplementary File 2: List of the top 100 differentially regulated genes in each cluster from the scRNA-seq analysis.
p_val	avg_logFC	pct.1	pct.2	p_val_adj	cluster	gene
0	2.02543	0.961	0.258	0	0	Lyz2
9.10073e-262	1.1991	0.892	0.202	1.20849e-257	0	Ifitm3
1.72148e-255	1.28916	0.765	0.159	2.28595e-251	0	Pid1
2.47703e-245	1.16508	0.817	0.162	3.28925e-241	0	Ccl9
7.18522e-215	1.07021	0.82	0.212	9.54125e-211	0	Alox5ap
2.04397e-213	0.949724	0.833	0.202	2.71418e-209	0	Ccl6
7.13306e-201	1.42603	0.874	0.41	9.47199e-197	0	H2-Ab1
9.07933e-200	1.14006	0.95	0.591	1.20564e-195	0	Gpx1
1.28926e-198	1.11329	0.946	0.469	1.71201e-194	0	Psap
2.50841e-193	1.57351	0.489	0.048	3.33092e-189	0	Fn1
8.48724e-176	1.00357	0.626	0.14	1.12702e-171	0	H2-DMb1
4.96856e-171	1.10482	0.752	0.232	6.59775e-167	0	Lgals3
9.63849e-171	1.14293	0.93	0.52	1.2799e-166	0	Cd74
5.60065e-161	0.95251	0.771	0.273	7.43711e-157	0	H2-DMa
3.40867e-156	0.802958	0.689	0.18	4.52637e-152	0	Zeb2
2.78152e-153	0.773705	0.919	0.373	3.69358e-149	0	Fcer1g
7.3388e-151	0.891537	0.661	0.185	9.74519e-147	0	Ccr2
5.22616e-150	1.04387	0.872	0.456	6.93982e-146	0	H2-Aa
1.76664e-143	1.43737	0.408	0.049	2.34592e-139	0	Lpl
2.75965e-139	0.784952	0.414	0.054	3.66454e-135	0	Clec4b1
7.01553e-139	0.637042	0.997	0.949	9.31592e-135	0	Ftl1
4.04497e-138	0.783747	0.462	0.075	5.37132e-134	0	Clec4a2
2.46824e-136	0.623149	0.71	0.205	3.27757e-132	0	Ifitm2
2.72169e-135	0.6614	0.954	0.454	3.61413e-131	0	Tyrobp
7.74808e-134	0.768888	0.86	0.388	1.02887e-129	0	S100a6
6.51814e-133	0.720554	0.558	0.121	8.65544e-129	0	Fcgr3
3.39183e-131	1.33	0.432	0.073	4.50401e-127	0	Lst1
1.34386e-129	0.920814	0.733	0.295	1.78451e-125	0	Gm2a
5.73436e-129	0.866989	0.447	0.079	7.61466e-125	0	Fcrls
1.58307e-128	0.768889	0.602	0.158	2.10216e-124	0	Cfp
6.1019e-126	0.807023	0.505	0.111	8.10271e-122	0	Cybb
4.55968e-115	0.75579	0.373	0.053	6.0548e-111	0	Clec4a3
8.12281e-115	0.621596	0.386	0.06	1.07863e-110	0	Mcub
1.03183e-113	0.432331	0.972	0.571	1.37017e-109	0	Cst3
2.57722e-110	0.781276	0.898	0.539	3.42229e-106	0	Fos
4.92508e-109	0.561223	0.452	0.094	6.54002e-105	0	Plbd1
8.99121e-109	0.568016	0.952	0.83	1.19394e-104	0	Arpc1b
8.21705e-106	1.97738	0.323	0.044	1.09114e-101	0	Lyz1
3.35741e-105	0.56539	0.686	0.234	4.4583e-101	0	Tmem176b
9.82482e-105	0.771351	0.673	0.246	1.30464e-100	0	Mt1
3.16202e-101	0.62842	0.552	0.168	4.19885e-97	0	Fam46a
5.66638e-101	0.636884	0.421	0.087	7.52439e-97	0	Cd14
1.47283e-100	0.672434	0.365	0.062	1.95578e-96	0	Ifitm6
2.03501e-100	0.703321	0.758	0.374	2.70229e-96	0	Ahnak
6.49912e-99	0.545017	0.35	0.057	8.63018e-95	0	Sirpa
3.20414e-98	0.587959	0.536	0.162	4.25477e-94	0	Kctd12
1.77167e-96	0.632206	0.341	0.054	2.3526e-92	0	Clec4a1
2.27509e-96	0.593178	0.575	0.195	3.02109e-92	0	Rassf4
1.15729e-94	0.56913	0.704	0.265	1.53677e-90	0	S100a4
8.52974e-92	0.458929	0.353	0.065	1.13266e-87	0	Itgam
9.36191e-92	0.452554	0.528	0.147	1.24317e-87	0	Clec10a
1.6866e-91	0.672285	0.605	0.221	2.23963e-87	0	Retnla
9.16087e-91	0.486957	0.625	0.222	1.21647e-86	0	Hexa
1.07521e-90	0.544609	0.388	0.087	1.42778e-86	0	Csf2ra
3.60165e-89	0.524819	0.426	0.101	4.78263e-85	0	Gda
9.13924e-88	0.490988	0.368	0.078	1.2136e-83	0	Nfam1
1.40355e-87	0.523932	0.538	0.17	1.86378e-83	0	Trf
2.15101e-87	0.70781	0.608	0.228	2.85632e-83	0	Spi1
4.80633e-87	0.410225	0.252	0.027	6.38233e-83	0	9830107B12Rik
1.86045e-86	0.483976	0.265	0.032	2.4705e-82	0	Lrp1
2.71867e-86	0.604037	0.615	0.247	3.61012e-82	0	Rrbp1
5.92272e-85	0.639828	0.564	0.207	7.86478e-81	0	Rgs2
2.18222e-84	0.564536	0.464	0.131	2.89777e-80	0	Mpeg1
5.46731e-83	0.418661	0.988	0.961	7.26004e-79	0	Fth1
1.56971e-82	0.547369	0.449	0.12	2.08442e-78	0	Csf1r
1.78635e-80	0.663243	0.631	0.269	2.3721e-76	0	Dusp1
3.2101e-80	0.543402	0.451	0.13	4.26269e-76	0	Cd68
1.58963e-79	0.842419	0.313	0.06	2.11087e-75	0	Tppp3
2.86484e-79	0.577777	0.508	0.172	3.80422e-75	0	Ncf2
9.62064e-79	0.52857	0.639	0.263	1.27752e-74	0	Ctsh
2.27098e-78	0.511731	0.967	0.918	3.01564e-74	0	Crip1
7.12716e-78	0.447655	0.56	0.195	9.46416e-74	0	Pld4
2.18095e-76	0.527833	0.27	0.043	2.89608e-72	0	Cd300c2
6.02206e-76	0.377109	0.292	0.054	7.9967e-72	0	Olfm1
6.65607e-75	0.447588	0.295	0.056	8.83859e-71	0	Slamf9
1.53902e-74	0.581192	0.665	0.311	2.04366e-70	0	Zfp36
2.85941e-73	0.476227	0.434	0.129	3.79701e-69	0	Tgfbi
6.16082e-73	0.675024	0.648	0.298	8.18096e-69	0	Ms4a6c
1.12504e-72	0.488597	0.459	0.146	1.49395e-68	0	App
6.29567e-72	0.458999	0.707	0.322	8.36002e-68	0	Ctsb
7.25116e-71	0.462798	0.356	0.095	9.62882e-67	0	Alcam
8.18578e-71	0.548941	0.271	0.049	1.08699e-66	0	Cd300a
2.13237e-70	0.664757	0.812	0.473	2.83157e-66	0	Ctss
7.16769e-70	0.474804	0.377	0.103	9.51798e-66	0	H2-Eb1
2.16897e-68	0.613192	0.654	0.306	2.88018e-64	0	Jun
4.04105e-67	0.428286	0.386	0.113	5.36611e-63	0	Irf5
1.13386e-65	0.525541	0.725	0.374	1.50566e-61	0	Atp2b1
1.67118e-65	-1.80926	0.346	0.575	2.21915e-61	0	AW112010
3.51915e-65	0.432527	0.401	0.125	4.67308e-61	0	Plekho1
2.51449e-64	0.639525	0.39	0.121	3.33899e-60	0	Plin2
5.11478e-64	0.421288	0.373	0.112	6.79192e-60	0	Unc119
5.34636e-64	0.377739	0.268	0.054	7.09943e-60	0	Plxnd1
9.15429e-63	0.44955	0.397	0.127	1.2156e-58	0	Ptpre
1.2504e-62	0.43006	0.351	0.096	1.66041e-58	0	Ptafr
4.50157e-62	0.469795	0.331	0.085	5.97764e-58	0	Hmox1
4.96728e-62	0.486483	0.711	0.381	6.59605e-58	0	Erp29
1.85001e-60	0.387704	0.356	0.105	2.45662e-56	0	Lyn
2.72139e-59	0.443791	0.551	0.243	3.61374e-55	0	Flna
1.13553e-58	0.406889	0.313	0.082	1.50787e-54	0	Sdc3
1.6838e-58	0.378983	0.393	0.12	2.23592e-54	0	Dab2
1.42046e-216	-2.6504	0.048	0.775	1.88622e-212	1	Tyrobp
3.3593e-212	-3.23698	0.127	0.801	4.46081e-208	1	Cd74
5.05213e-205	0.561108	0.999	0.987	6.70872e-201	1	Rps24
8.16848e-202	0.553667	1	0.987	1.08469e-197	1	Rps15a
6.12332e-190	-3.08716	0.079	0.735	8.13116e-186	1	H2-Aa
2.76443e-179	0.558677	0.994	0.985	3.67089e-175	1	Rplp1
6.78624e-177	0.677185	0.984	0.906	9.01145e-173	1	Rpl12
7.6748e-177	-1.7687	0.952	0.967	1.01914e-172	1	Ftl1
2.10068e-176	0.489369	0.996	0.99	2.78949e-172	1	Rps16
1.32356e-174	-2.05341	0.044	0.691	1.75755e-170	1	Fcer1g
3.59276e-171	-2.30419	0.322	0.806	4.77083e-167	1	Cst3
2.22783e-167	-2.82428	0.081	0.695	2.95833e-163	1	H2-Ab1
1.69555e-161	0.461551	1	0.996	2.25152e-157	1	Rps27
1.54115e-160	0.460693	1	0.989	2.0465e-156	1	Rpl17
7.32072e-160	0.506491	0.994	0.969	9.72119e-156	1	Rps7
2.33865e-152	0.956499	0.897	0.512	3.1055e-148	1	Cd3d
4.80216e-152	0.465259	0.997	0.984	6.37679e-148	1	Rps8
1.31624e-151	0.44679	0.997	0.988	1.74784e-147	1	Rplp2
2.96479e-150	0.465768	0.999	0.977	3.93694e-146	1	Rpl21
4.3471e-150	0.596891	0.992	0.903	5.77251e-146	1	Tmsb10
1.75086e-149	0.471355	0.994	0.985	2.32497e-145	1	Rpl39
7.67928e-145	0.394737	0.997	0.995	1.01973e-140	1	Rpl13
1.02276e-144	0.471545	0.996	0.972	1.35812e-140	1	Rps15
3.15042e-141	0.904408	0.96	0.601	4.18344e-137	1	Trbc2
2.52111e-139	0.412172	0.999	0.992	3.34778e-135	1	Rpl18a
4.31808e-134	0.525418	0.986	0.948	5.73397e-130	1	Rps20
1.01761e-132	0.889724	0.891	0.523	1.35129e-128	1	Cd3g
1.60677e-132	0.419453	0.992	0.974	2.13362e-128	1	Rps13
2.57114e-132	0.43651	0.993	0.982	3.41421e-128	1	Rpl23a
2.24852e-130	0.449561	0.992	0.961	2.9858e-126	1	Rps10
4.44029e-130	0.420307	0.993	0.981	5.89626e-126	1	Rps3
6.46677e-130	0.357397	0.999	0.993	8.58722e-126	1	Rps23
1.40592e-127	0.385631	0.993	0.989	1.86692e-123	1	Rps3a1
6.94946e-127	0.416844	0.996	0.982	9.22818e-123	1	Rpl23
1.04248e-126	0.443277	0.996	0.974	1.38431e-122	1	Rpl8
1.23993e-126	-3.18447	0.082	0.593	1.64651e-122	1	Lyz2
1.07642e-125	0.415336	0.997	0.983	1.42938e-121	1	Rps4x
1.56664e-123	0.456366	0.992	0.957	2.08035e-119	1	Rps18
3.77997e-123	-1.56903	0.282	0.717	5.01942e-119	1	Psap
5.15948e-122	0.38621	0.997	0.979	6.85127e-118	1	Rpl19
4.99946e-120	0.476661	0.989	0.931	6.63878e-116	1	Rpsa
2.37604e-119	0.415758	0.994	0.98	3.15514e-115	1	Rpl14
2.81257e-119	0.419034	0.994	0.972	3.73481e-115	1	Rps28
2.48368e-117	-0.860073	0.967	0.97	3.29808e-113	1	Fth1
1.50438e-116	0.394277	0.992	0.98	1.99767e-112	1	Rps6
3.76957e-115	-2.14163	0.037	0.529	5.00561e-111	1	Ifitm3
9.92224e-115	0.34699	0.997	0.989	1.31757e-110	1	Rps14
1.51467e-113	0.368804	1	0.993	2.01132e-109	1	Rpl32
6.32908e-113	-1.44612	0.024	0.513	8.40438e-109	1	Alox5ap
7.98827e-112	0.443444	0.987	0.971	1.06076e-107	1	Rplp0
1.09057e-110	0.458372	0.984	0.932	1.44817e-106	1	Rpl4
1.84079e-110	0.300299	1	0.997	2.44438e-106	1	Rps29
1.66075e-107	-2.39811	0.035	0.506	2.2053e-103	1	Ccl6
2.25316e-107	0.86388	0.819	0.47	2.99198e-103	1	Trac
2.54197e-107	0.371058	1	0.98	3.37548e-103	1	Rpl36
1.4962e-106	0.353794	0.993	0.975	1.9868e-102	1	Rpl11
2.22317e-106	0.475724	0.982	0.928	2.95215e-102	1	Rpl36a
6.22821e-106	0.409341	0.984	0.945	8.27045e-102	1	Rpl31
1.03698e-105	-1.24765	0.156	0.646	1.37701e-101	1	S100a6
1.59296e-105	0.446334	0.992	0.944	2.11529e-101	1	Rps17
1.86599e-103	-1.17552	0.024	0.485	2.47785e-99	1	Ctsh
6.27633e-103	0.537588	0.983	0.884	8.33433e-99	1	Rpl22l1
1.92499e-102	0.341599	0.999	0.989	2.55619e-98	1	Rpl35a
2.03204e-102	0.323414	0.999	0.99	2.69835e-98	1	Rps27a
5.79686e-102	0.44483	0.977	0.929	7.69765e-98	1	Rpl30
7.92151e-102	0.413821	0.992	0.956	1.0519e-97	1	Rpl18
1.64278e-101	-2.39871	0.037	0.492	2.18144e-97	1	Wfdc17
3.65648e-100	0.370421	0.993	0.982	4.85544e-96	1	Rps5
5.45723e-100	-1.29678	0.078	0.531	7.24666e-96	1	H2-DMa
1.3327e-99	-1.79908	0.031	0.482	1.76969e-95	1	Mt1
6.68937e-98	-1.74864	0.027	0.467	8.88282e-94	1	Ccl9
1.70957e-97	-1.31023	0.03	0.477	2.27013e-93	1	Tmem176b
2.13616e-96	-1.2812	0.045	0.497	2.83661e-92	1	Lgals3
6.2829e-96	0.840743	0.744	0.432	8.34306e-92	1	Cd3e
9.09965e-95	0.416959	0.986	0.939	1.20834e-90	1	Rps21
1.10043e-94	1.04257	0.598	0.258	1.46126e-90	1	Cd8b1
5.98007e-94	-1.212	0.476	0.77	7.94093e-90	1	Gpx1
4.85929e-93	-1.47913	0.03	0.46	6.45265e-89	1	Ifitm2
3.16474e-92	-1.09659	0.02	0.443	4.20246e-88	1	Spi1
3.18295e-91	0.33485	0.989	0.98	4.22664e-87	1	Rpl9
3.26869e-91	0.349434	0.994	0.972	4.34049e-87	1	Rpl6
4.55575e-90	0.394389	0.984	0.969	6.04958e-86	1	Rpl35
1.60635e-89	-1.13098	0.03	0.447	2.13307e-85	1	Marcks
9.14803e-89	-1.01536	0.091	0.528	1.21477e-84	1	Ctsz
1.86659e-85	0.407609	0.992	0.961	2.47864e-81	1	Rps12
2.06424e-85	0.642944	0.888	0.616	2.7411e-81	1	Limd2
2.11191e-85	-0.80156	0.909	0.94	2.80441e-81	1	Crip1
3.66901e-85	0.335134	0.997	0.99	4.87208e-81	1	Rps19
6.60992e-84	-1.07236	0.03	0.43	8.77731e-80	1	Zeb2
8.69345e-83	0.386501	0.986	0.949	1.1544e-78	1	Rpl15
1.50657e-82	0.365173	0.987	0.946	2.00058e-78	1	Rpl3
4.56335e-82	0.338998	0.999	0.971	6.05967e-78	1	Tpt1
1.03304e-80	0.50276	0.953	0.815	1.37177e-76	1	Rpl5
2.93789e-80	0.333735	0.993	0.973	3.90123e-76	1	Eef1a1
3.37021e-80	0.324054	0.987	0.968	4.4753e-76	1	Rps25
1.72412e-79	-0.860927	0.018	0.401	2.28945e-75	1	Rassf4
2.39631e-79	-0.984612	0.016	0.395	3.18206e-75	1	Pld4
2.86711e-79	0.385954	0.984	0.936	3.80723e-75	1	Rpl10a
8.83816e-79	-1.00663	0.076	0.479	1.17362e-74	1	Anxa2
2.43215e-78	0.299005	0.99	0.984	3.22965e-74	1	Rpl27a
0	3.68445	0.954	0.105	0	2	Igkc
0	2.73096	0.873	0.063	0	2	Cd79a
3.47613e-301	2.24577	0.815	0.073	4.61596e-297	2	Ebf1
1.16161e-290	2.52952	0.747	0.057	1.5425e-286	2	Ms4a1
1.41238e-282	2.57213	0.716	0.051	1.8755e-278	2	Iglc2
1.43728e-279	2.43838	0.88	0.101	1.90856e-275	2	Ly6d
1.71032e-239	2.36491	0.691	0.066	2.27113e-235	2	Cd79b
1.62547e-181	1.77608	0.636	0.084	2.15846e-177	2	Ighd
5.16478e-164	2.10217	0.358	0.014	6.8583e-160	2	Vpreb3
7.15519e-163	1.73805	0.509	0.05	9.50138e-159	2	Gm31243
3.66552e-157	1.83921	0.522	0.056	4.86744e-153	2	Iglc3
6.83367e-141	1.38366	0.417	0.036	9.07443e-137	2	Tnfrsf13c
6.32017e-129	1.25215	0.349	0.024	8.39255e-125	2	Fcmr
7.68013e-120	1.25861	0.377	0.034	1.01984e-115	2	Mzb1
3.28431e-98	0.984613	0.293	0.024	4.36124e-94	2	Pax5
2.85261e-84	1.0256	0.275	0.026	3.78798e-80	2	Fcrl1
7.18196e-82	1.09668	0.395	0.068	9.53693e-78	2	Bank1
4.5332e-75	1.68169	0.821	0.486	6.01964e-71	2	Ighm
6.55898e-71	-1.96533	0.123	0.666	8.70967e-67	2	Tyrobp
8.40847e-71	1.12495	0.346	0.061	1.11656e-66	2	Siglecg
2.2325e-70	1.16841	0.664	0.258	2.96454e-66	2	Mef2c
3.50339e-69	1.4274	0.549	0.185	4.65216e-65	2	H2-DMb2
1.1396e-67	-1.9125	0.052	0.601	1.51328e-63	2	Fcer1g
1.33224e-61	1.22035	0.778	0.484	1.76908e-57	2	Cd37
3.83543e-61	0.871647	0.287	0.046	5.09306e-57	2	Scd1
8.51408e-59	-1.73606	0.09	0.587	1.13058e-54	2	S100a6
4.41585e-52	-1.40107	0.275	0.72	5.86381e-48	2	Lgals1
5.18239e-48	-2.92339	0.102	0.521	6.88169e-44	2	Lyz2
2.82378e-46	-2.05435	0.04	0.461	3.7497e-42	2	Ifitm3
5.25227e-44	1.52091	0.417	0.141	6.97449e-40	2	Cd24a
1.42943e-42	-1.23571	0.04	0.444	1.89814e-38	2	Alox5ap
7.55123e-41	1.42127	0.389	0.132	1.00273e-36	2	Chchd10
1.17512e-40	0.699707	0.898	0.702	1.56044e-36	2	Ly6e
2.19761e-40	-1.27394	0.028	0.415	2.91821e-36	2	Tmem176b
4.42567e-40	-1.41125	0.056	0.442	5.87684e-36	2	S100a4
1.50529e-39	-2.17563	0.059	0.438	1.99887e-35	2	Ccl6
2.06908e-39	-1.6513	0.037	0.419	2.74753e-35	2	Mt1
2.14115e-39	0.569773	0.981	0.875	2.84324e-35	2	Cd52
2.65528e-39	-1.33721	0.929	0.968	3.52595e-35	2	Ftl1
7.60924e-39	-1.58505	0.031	0.406	1.01043e-34	2	Ccl9
6.04111e-38	-1.12854	0.315	0.653	8.02199e-34	2	Psap
9.28305e-38	-1.31318	0.031	0.401	1.2327e-33	2	Ifitm2
5.41491e-37	0.727324	0.833	0.695	7.19046e-33	2	Ltb
6.423e-36	-0.947759	0.16	0.533	8.52911e-32	2	Ahnak
8.81796e-36	-2.31492	0.068	0.426	1.17094e-31	2	Wfdc17
3.63699e-35	-0.960261	0.062	0.425	4.82956e-31	2	Anxa2
2.45818e-34	-1.51494	0.497	0.719	3.26422e-30	2	Cst3
3.82043e-34	0.543949	0.991	0.608	5.07315e-30	2	Cd74
1.32677e-33	-0.749874	0.843	0.944	1.76181e-29	2	Crip1
2.2595e-33	-0.713421	0.543	0.825	3.00039e-29	2	Npc2
6.01944e-33	-0.772295	0.349	0.675	7.99322e-29	2	Rps27l
2.46183e-32	-1.12164	0.09	0.43	3.26906e-28	2	Lgals3
2.50348e-32	1.00965	0.306	0.099	3.32437e-28	2	Hvcn1
4.75063e-32	-0.93766	0.046	0.383	6.30837e-28	2	Pid1
7.88925e-32	-0.935055	0.401	0.697	1.04761e-27	2	Vim
1.10151e-31	-1.3746	0.133	0.478	1.46269e-27	2	Ctsb
3.94935e-31	-0.941706	0.043	0.367	5.24434e-27	2	Ccr2
7.69312e-31	-1.00511	0.019	0.333	1.02157e-26	2	Tmem176a
1.19988e-27	-1.03474	0.025	0.315	1.59331e-23	2	Trf
1.63385e-27	-0.525086	0.679	0.89	2.16959e-23	2	Arpc1b
4.20397e-27	0.659408	0.941	0.887	5.58246e-23	2	H3f3a
3.22326e-26	0.815086	0.361	0.154	4.28017e-22	2	Ralgps2
4.11972e-26	-0.894741	0.012	0.286	5.47058e-22	2	Fcgr3
1.5873e-25	-0.555944	0.052	0.344	2.10778e-21	2	Rassf4
1.94453e-25	-0.608415	0.37	0.674	2.58214e-21	2	Atox1
3.97071e-25	-0.622518	0.568	0.839	5.27271e-21	2	H2afz
3.97867e-25	-0.685699	0.08	0.384	5.28327e-21	2	Marcks
1.07614e-24	-0.979023	0.025	0.294	1.429e-20	2	Clec10a
1.83277e-24	-0.916148	0.043	0.319	2.43374e-20	2	Grn
1.96609e-24	-3.09755	0.099	0.369	2.61077e-20	2	Retnla
3.22908e-24	-0.628069	0.009	0.265	4.2879e-20	2	Batf3
5.70413e-24	-0.54358	0.136	0.44	7.57451e-20	2	Tmem256
9.71413e-24	-0.850716	0.049	0.325	1.28994e-19	2	Cfp
9.92049e-24	-0.583985	0.238	0.548	1.31734e-19	2	Atpif1
4.35835e-23	-0.596856	0.083	0.362	5.78745e-19	2	Creg1
5.16103e-23	0.626423	0.744	0.575	6.85333e-19	2	Ptprcap
6.37615e-23	-0.584883	0.083	0.369	8.46689e-19	2	Zeb2
2.907e-22	-0.72779	0.015	0.256	3.86021e-18	2	Cd68
7.86831e-22	-0.347237	1	1	1.04483e-17	2	Tmsb4x
1.30898e-21	-0.600172	0.019	0.26	1.7382e-17	2	Mpeg1
1.32836e-21	-1.65022	0.21	0.477	1.76393e-17	2	Selenop
1.79585e-21	-0.416973	0.58	0.819	2.38471e-17	2	Sem1
1.93071e-21	-0.574235	0.355	0.636	2.5638e-17	2	Rgs10
2.45899e-21	-0.558515	0.028	0.269	3.26529e-17	2	App
3.14156e-21	-0.566237	0.142	0.417	4.17168e-17	2	Neat1
4.55015e-21	-0.858699	0.019	0.253	6.04214e-17	2	Pltp
6.91259e-21	-0.515544	0.414	0.708	9.17923e-17	2	Tspo
6.9272e-21	1.04508	0.398	0.212	9.19863e-17	2	Napsa
3.57338e-20	-0.779174	0.216	0.487	4.74509e-16	2	Id2
4.28158e-20	-0.618445	0.336	0.604	5.68551e-16	2	Sat1
3.57156e-19	-0.521389	0.299	0.573	4.74268e-15	2	Selplg
6.90736e-19	-0.538415	0.077	0.317	9.17229e-15	2	Efhd2
6.94637e-19	-0.786811	0.198	0.452	9.22408e-15	2	Ctsd
7.50217e-19	-0.61402	0.151	0.409	9.96213e-15	2	Dusp1
9.12066e-19	0.692091	0.278	0.117	1.21113e-14	2	H2-Oa
1.28704e-18	-0.398277	0.383	0.662	1.70906e-14	2	Smdt1
1.74242e-18	-0.509321	0.059	0.289	2.31376e-14	2	Lamp1
1.7728e-18	-0.492469	0.108	0.359	2.35411e-14	2	Itgb1
4.91962e-18	-0.696622	0.694	0.878	6.53276e-14	2	Itm2b
5.31933e-18	-0.551369	0.568	0.781	7.06354e-14	2	S100a10
0	3.28133	0.967	0.013	0	3	Fscn1
0	2.74277	0.783	0.009	0	3	Ccl22
0	2.64409	0.801	0.008	0	3	H2-M2
0	2.16027	0.627	0.006	0	3	Zmynd15
0	1.70629	0.772	0.006	0	3	Cacnb3
0	1.65841	0.681	0.007	0	3	Nudt17
0	1.63421	0.714	0.019	0	3	Il4i1
0	1.60665	0.743	0.038	0	3	Basp1
0	1.35894	0.638	0.013	0	3	Ankrd33b
4.04639e-302	1.90611	0.848	0.07	5.3732e-298	3	Cxcl16
5.08315e-287	1.70981	0.79	0.061	6.74992e-283	3	Socs2
1.4169e-281	2.41085	0.975	0.144	1.8815e-277	3	Marcksl1
1.19635e-272	2.45451	0.815	0.077	1.58864e-268	3	Serpinb6b
1.12654e-255	1.6461	0.721	0.056	1.49593e-251	3	Mxd1
1.70426e-248	0.893622	0.417	0.003	2.26309e-244	3	Slco5a1
4.38918e-246	2.12462	0.866	0.117	5.82839e-242	3	Gadd45b
1.2694e-235	1.55056	0.736	0.071	1.68563e-231	3	Relb
1.61382e-234	0.896316	0.402	0.004	2.14299e-230	3	Synpo2
3.99175e-229	0.917476	0.373	0.001	5.30065e-225	3	Cdkn2b
1.39184e-226	1.41248	0.645	0.05	1.84822e-222	3	Pfkfb3
7.61345e-225	1.71407	0.786	0.096	1.01099e-220	3	Tbc1d4
4.204e-220	2.5127	0.975	0.247	5.58249e-216	3	Tmem123
8.40251e-203	1.42873	0.703	0.082	1.11577e-198	3	Net1
1.7824e-198	3.28242	0.946	0.259	2.36685e-194	3	Epsti1
7.59794e-198	1.26923	0.525	0.031	1.00893e-193	3	Eno3
3.78048e-194	1.65252	0.851	0.154	5.0201e-190	3	Samsn1
1.01051e-191	1.25981	0.623	0.058	1.34186e-187	3	Rogdi
2.39163e-189	1.35459	0.583	0.049	3.17584e-185	3	Anxa3
4.8647e-187	1.16187	0.522	0.035	6.45983e-183	3	Il15
3.47771e-186	1.34348	0.594	0.054	4.61805e-182	3	Hmgn3
2.97368e-182	2.71972	0.975	0.268	3.94875e-178	3	Ccl5
5.02034e-181	0.806645	0.359	0.008	6.66651e-177	3	Arhgap22
4.83912e-176	0.884717	0.431	0.021	6.42586e-172	3	Il15ra
6.00738e-174	1.12808	0.424	0.02	7.9772e-170	3	2200002D01Rik
6.40283e-173	0.771313	0.366	0.011	8.50232e-169	3	Adam23
6.92247e-168	1.21508	0.562	0.053	9.19235e-164	3	Hebp1
4.85643e-165	1.34079	0.656	0.088	6.44886e-161	3	Avpi1
8.01624e-158	1.22482	0.822	0.138	1.06448e-153	3	Cd63
1.33729e-157	1.69812	0.772	0.154	1.77578e-153	3	Bcl2a1b
3.69818e-156	1.03871	0.254	0.001	4.91082e-152	3	Apol7c
2.11731e-153	0.849662	0.301	0.006	2.81157e-149	3	M1ap
1.39978e-151	1.17501	0.645	0.093	1.85877e-147	3	Pgap2
1.22357e-149	1.46521	0.801	0.183	1.62478e-145	3	Rnf115
2.64342e-149	1.15736	0.598	0.079	3.51019e-145	3	Arhgap31
1.57345e-146	1.39749	0.793	0.183	2.08938e-142	3	Traf1
1.08365e-140	1.15077	0.475	0.043	1.43898e-136	3	Serpinb9
1.37289e-139	1.20536	0.707	0.133	1.82307e-135	3	Fam49a
1.30396e-138	1.26613	0.594	0.087	1.73153e-134	3	Bcl2a1a
1.09112e-137	1.47026	0.866	0.245	1.4489e-133	3	Tmem176a
1.63868e-136	0.913556	0.504	0.055	2.17601e-132	3	Plxnc1
2.87005e-135	1.67504	0.982	0.592	3.81114e-131	3	Lsp1
2.09867e-134	1.40325	0.714	0.139	2.78682e-130	3	Cdkn1a
3.7715e-134	1.42485	1	0.982	5.00818e-130	3	B2m
5.28589e-132	1.00159	0.489	0.053	7.01913e-128	3	Slamf7
4.72416e-130	1.0039	0.261	0.006	6.27321e-126	3	Clu
1.26072e-129	0.886625	0.467	0.049	1.67411e-125	3	Tmcc3
1.25776e-128	0.806228	0.399	0.031	1.67018e-124	3	Fnbp1l
6.25733e-126	0.902573	1	1	8.30911e-122	3	Tmsb4x
5.37673e-122	0.871966	0.464	0.052	7.13976e-118	3	Vhl
8.6417e-121	1.03315	0.395	0.033	1.14753e-116	3	Cd40
8.76653e-118	0.611968	0.312	0.017	1.16411e-113	3	Sema6d
3.92836e-117	1.1371	0.58	0.099	5.21647e-113	3	Rab9
1.65199e-116	1.35568	0.906	0.323	2.19367e-112	3	Tmem176b
5.75944e-111	1.51489	0.953	0.588	7.64797e-107	3	Psme2
1.73309e-109	1.00662	1	0.999	2.30137e-105	3	Malat1
3.45851e-109	1.00521	0.486	0.07	4.59255e-105	3	Gnb4
1.62193e-108	1.56545	0.583	0.117	2.15377e-104	3	Gyg
1.34536e-107	1.41607	0.953	0.553	1.7865e-103	3	Psme1
4.04426e-107	1.40538	0.833	0.317	5.37038e-103	3	Ccr7
4.49377e-105	1.19278	0.855	0.303	5.96728e-101	3	Marcks
6.44981e-105	1.19658	0.736	0.213	8.56471e-101	3	Iscu
5.91765e-104	0.861444	0.46	0.063	7.85805e-100	3	Lrrk1
2.50035e-100	1.09032	0.623	0.143	3.32022e-96	3	Spint2
1.05867e-97	0.608249	0.33	0.028	1.40581e-93	3	Snn
1.99685e-97	0.800047	0.536	0.095	2.65162e-93	3	Swap70
3.70223e-97	0.951514	0.536	0.1	4.91619e-93	3	Icam1
1.74389e-94	1.09238	0.312	0.027	2.31571e-90	3	Mfge8
7.7049e-94	0.7571	0.384	0.046	1.02313e-89	3	Rnf19b
6.83003e-93	0.56207	0.254	0.015	9.0696e-89	3	Slc4a8
8.18704e-93	1.50079	0.913	0.464	1.08716e-88	3	AW112010
1.76506e-92	1.03482	0.993	0.882	2.34382e-88	3	H2-K1
3.71319e-92	0.927734	0.493	0.088	4.93075e-88	3	Htra2
2.17057e-91	1.22348	0.627	0.167	2.88231e-87	3	Etv3
1.26003e-90	0.899531	0.609	0.145	1.6732e-86	3	Pcgf5
2.6743e-90	1.20907	0.942	0.575	3.5512e-86	3	Nfkbia
3.29123e-88	0.584558	0.359	0.042	4.37042e-84	3	Adora2a
7.77373e-86	1.27462	0.902	0.553	1.03227e-81	3	Brk1
9.29757e-85	0.93517	0.467	0.086	1.23462e-80	3	Birc2
1.72794e-84	0.889505	0.489	0.094	2.29454e-80	3	Dok1
1.10446e-82	1.01237	0.514	0.106	1.46662e-78	3	Bmp2k
1.05735e-79	0.618004	0.333	0.04	1.40405e-75	3	Frmd4a
1.4417e-77	1.06004	0.884	0.417	1.91443e-73	3	Id2
2.25909e-77	0.624712	0.257	0.022	2.99984e-73	3	Nostrin
5.79407e-77	1.08779	0.851	0.358	7.69395e-73	3	S100a4
1.79674e-76	0.825568	0.482	0.101	2.38589e-72	3	Ccng2
1.10066e-74	1.03705	0.953	0.781	1.46157e-70	3	Npc2
2.97962e-74	0.745331	0.402	0.069	3.95663e-70	3	Mthfs
2.53837e-73	0.869449	0.692	0.226	3.3707e-69	3	Rgs1
6.55721e-73	0.591819	0.322	0.042	8.70731e-69	3	Ogfrl1
1.1749e-72	0.805846	1	0.984	1.56016e-68	3	H2-D1
0	3.00836	0.929	0.032	0	4	Cd209f
0	2.6201	0.866	0.019	0	4	Fcna
0	2.40994	0.895	0.042	0	4	Folr2
0	2.33348	0.849	0.02	0	4	Cd209g
0	2.09594	0.744	0.013	0	4	Lyve1
0	1.88682	0.777	0.027	0	4	Cbr2
0	1.65784	0.723	0.026	0	4	Gas6
5.14123e-307	2.69568	0.971	0.094	6.82703e-303	4	C1qc
4.01102e-304	2.87143	0.979	0.101	5.32623e-300	4	C1qa
2.02013e-299	2.60852	0.975	0.098	2.68253e-295	4	C1qb
3.79533e-294	1.58526	0.63	0.02	5.03981e-290	4	Ednrb
6.21412e-294	2.47792	0.971	0.096	8.25174e-290	4	Pf4
1.10261e-278	2.00876	0.815	0.059	1.46415e-274	4	Ccl24
4.64358e-271	1.84718	0.676	0.033	6.16621e-267	4	Hal
3.49644e-263	2.5549	0.567	0.017	4.64292e-259	4	Ccl8
2.12299e-253	1.68045	0.639	0.032	2.81911e-249	4	C4b
1.24058e-251	1.592	0.483	0.009	1.64737e-247	4	Clec3b
1.04033e-242	1.26951	0.475	0.009	1.38146e-238	4	Pla2g2d
4.31048e-240	2.36063	0.941	0.144	5.72389e-236	4	Fcgrt
2.82782e-227	1.49703	0.655	0.043	3.75506e-223	4	Rnase4
4.19283e-221	2.03516	0.819	0.094	5.56766e-217	4	Ltc4s
2.4437e-219	1.64734	0.538	0.024	3.24498e-215	4	Pmp22
4.51984e-216	2.19944	0.937	0.167	6.00189e-212	4	F13a1
2.97162e-213	1.94137	0.908	0.147	3.94602e-209	4	Mrc1
5.53974e-211	1.65316	0.777	0.08	7.35622e-207	4	Fxyd2
5.96504e-209	2.54888	0.966	0.209	7.92097e-205	4	Ninj1
7.39277e-198	1.21727	0.471	0.019	9.81685e-194	4	Calml4
4.0742e-196	1.37472	0.609	0.043	5.41013e-192	4	Ms4a7
7.59737e-195	1.45657	0.651	0.059	1.00885e-190	4	Fam213b
3.78663e-193	2.97245	0.983	0.253	5.02827e-189	4	Apoe
5.56565e-193	1.16389	0.475	0.02	7.39062e-189	4	Igf1
1.27089e-190	1.55852	0.437	0.015	1.68762e-186	4	Cd209b
3.93988e-190	1.4238	0.622	0.052	5.23177e-186	4	Cfh
1.18331e-184	1.17837	0.479	0.023	1.57132e-180	4	Stab1
2.06883e-182	1.67142	0.777	0.108	2.7472e-178	4	Maf
4.24207e-180	1.94482	0.874	0.175	5.63304e-176	4	Pltp
3.80477e-178	1.70493	0.853	0.151	5.05235e-174	4	Dab2
8.15008e-168	1.14331	0.462	0.026	1.08225e-163	4	Timd4
2.23397e-165	1.08205	0.445	0.024	2.96649e-161	4	Selenbp1
4.25991e-165	1.49363	0.727	0.107	5.65673e-161	4	Serpinb6a
8.72587e-165	2.41305	0.975	0.288	1.15871e-160	4	Retnla
1.19978e-162	1.49093	0.702	0.093	1.59318e-158	4	Mafb
4.16396e-162	1.03726	0.391	0.015	5.52933e-158	4	Tslp
6.74067e-160	1.1532	0.504	0.038	8.95094e-156	4	Rcn3
1.14651e-159	1.46281	0.697	0.1	1.52244e-155	4	Timp2
3.22979e-159	2.72112	0.971	0.34	4.28884e-155	4	Wfdc17
4.27319e-158	1.81476	0.647	0.082	5.67437e-154	4	Cd209d
6.72576e-158	1.80838	0.895	0.214	8.93113e-154	4	Clec10a
6.07614e-152	2.59366	0.979	0.405	8.06851e-148	4	Selenop
3.14222e-151	1.80133	0.895	0.24	4.17255e-147	4	Grn
1.38755e-145	1.98728	0.983	0.397	1.84252e-141	4	Ctsb
5.57055e-145	1.63861	0.815	0.174	7.39714e-141	4	Lgmn
1.26638e-142	1.454	0.815	0.174	1.68163e-138	4	Csf1r
4.93005e-141	1.92819	0.975	0.351	6.54662e-137	4	Ccl6
1.72349e-140	1.10781	0.487	0.043	2.28863e-136	4	Tcn2
2.18313e-139	1.51126	0.794	0.17	2.89898e-135	4	Blvrb
7.68179e-136	1.28763	0.643	0.095	1.02006e-131	4	Emp1
2.33265e-134	1.41248	0.79	0.15	3.09752e-130	4	Cd63
1.70922e-130	1.19081	0.571	0.074	2.26968e-126	4	Abca1
2.16767e-130	1.77399	0.92	0.316	2.87844e-126	4	Ifitm2
1.23942e-128	1.65384	0.966	0.33	1.64582e-124	4	Mt1
3.71028e-127	1.2865	0.567	0.075	4.92688e-123	4	Wwp1
3.72039e-127	1.71923	0.992	0.848	4.9403e-123	4	Itm2b
2.53158e-119	1.58656	0.832	0.239	3.36168e-115	4	Trf
1.45661e-117	1.3018	0.609	0.103	1.93424e-113	4	Camk1
8.71083e-116	0.99814	0.408	0.037	1.15671e-111	4	Tns1
9.42832e-116	1.55474	0.962	0.372	1.25199e-111	4	Ifitm3
9.47221e-115	0.999765	0.45	0.047	1.25782e-110	4	Ifi207
1.15271e-114	1.15188	0.538	0.073	1.53068e-110	4	C5ar1
1.7192e-114	0.968206	0.445	0.044	2.28292e-110	4	Trem2
3.29742e-114	1.45989	1	0.961	4.37864e-110	4	Ftl1
2.72943e-109	1.0632	1	0.967	3.62441e-105	4	Fth1
4.14177e-106	-1.9438	0.298	0.935	5.49986e-102	4	Cd52
1.54557e-105	1.40927	0.832	0.252	2.05236e-101	4	Cfp
5.40048e-105	1.10412	0.567	0.098	7.1713e-101	4	Cd302
7.85448e-103	0.808176	0.319	0.022	1.043e-98	4	Zfyve21
3.23766e-102	0.907038	0.42	0.045	4.29929e-98	4	Ctsl
5.91162e-102	0.803859	0.349	0.028	7.85004e-98	4	Mgst1
9.66281e-101	-1.73296	0.534	0.955	1.28312e-96	4	Tmsb10
2.30176e-99	1.37593	0.891	0.323	3.0565e-95	4	Ccl9
9.53207e-99	-0.968248	0.983	0.992	1.26576e-94	4	Rpl17
1.31104e-98	-0.938025	0.983	0.987	1.74092e-94	4	Rpl39
1.60598e-98	0.918958	0.387	0.039	2.13258e-94	4	C3ar1
5.14511e-97	-1.14772	0.945	0.977	6.83219e-93	4	Rplp0
2.44462e-95	-0.984234	0.975	0.991	3.24621e-91	4	Rps15a
4.33241e-95	1.35555	0.824	0.308	5.75301e-91	4	Hexa
6.48083e-95	-0.909253	0.979	0.993	8.60589e-91	4	Rps16
1.02842e-94	2.01008	0.929	0.588	1.36564e-90	4	Ifi27l2a
2.22581e-93	-0.900966	1	0.997	2.95566e-89	4	Rps27
2.81319e-93	-0.899995	0.987	0.99	3.73564e-89	4	Rplp2
6.65321e-93	0.819585	0.345	0.031	8.83479e-89	4	Tmem37
1.08337e-92	-0.867594	0.987	0.994	1.43861e-88	4	Rpl18a
7.09482e-92	1.15208	0.803	0.268	9.42121e-88	4	Pld4
7.80067e-92	-0.936945	0.975	0.991	1.03585e-87	4	Rps24
1.39035e-91	-1.21461	0.849	0.952	1.84625e-87	4	Rpsa
3.28136e-91	1.20794	0.651	0.165	4.35732e-87	4	Fcgr2b
4.78482e-91	1.23419	0.739	0.217	6.35376e-87	4	Fcgr3
5.60893e-90	-0.887951	0.958	0.985	7.4481e-86	4	Rps6
7.57788e-90	-0.76426	0.992	0.995	1.00627e-85	4	Rpl32
1.08737e-89	-0.909028	0.95	0.98	1.44392e-85	4	Eef1a1
0	2.47771	0.64	0.013	0	5	Ncr1
3.52983e-299	3.70044	0.614	0.016	4.68726e-295	5	Gzma
1.64007e-154	2.70045	0.952	0.316	2.17786e-150	5	Nkg7
1.5397e-153	1.53772	0.342	0.011	2.04457e-149	5	Klre1
2.01042e-149	2.036	0.57	0.063	2.66964e-145	5	Klrk1
9.67312e-137	2.35247	0.732	0.15	1.28449e-132	5	Klrd1
2.99993e-130	1.74536	0.947	0.282	3.98361e-126	5	Ccl5
9.94211e-121	1.51417	0.338	0.019	1.32021e-116	5	Klrb1c
5.30976e-111	1.99935	0.961	0.467	7.05084e-107	5	AW112010
9.50034e-80	1.86898	0.496	0.098	1.26155e-75	5	Ctla2a
6.25812e-66	-3.51613	0.057	0.695	8.31016e-62	5	Cd74
1.301e-61	1.6228	0.338	0.054	1.7276e-57	5	Prf1
1.16372e-57	1.68331	0.303	0.043	1.54531e-53	5	Ccl3
1.12108e-56	-3.14655	0.039	0.629	1.48869e-52	5	H2-Aa
1.63818e-50	-2.15732	0.228	0.733	2.17534e-46	5	Cst3
2.72086e-50	1.52833	0.439	0.12	3.61303e-46	5	Ctsw
3.02802e-50	-0.64008	0.934	0.996	4.02091e-46	5	Rps19
3.34562e-49	0.830592	0.974	0.879	4.44265e-45	5	Cd52
6.44971e-49	2.32961	0.298	0.052	8.56457e-45	5	Ccl4
1.76023e-48	-2.75598	0.061	0.594	2.33741e-44	5	H2-Ab1
3.63443e-47	-1.61139	0.789	0.978	4.82616e-43	5	Ftl1
8.86514e-47	1.28901	0.276	0.047	1.1772e-42	5	Klrb1a
1.34686e-46	1.43813	0.465	0.149	1.78849e-42	5	Il2rb
1.97924e-45	1.00955	0.882	0.749	2.62823e-41	5	S100a10
4.90371e-43	-1.31065	0.105	0.617	6.51163e-39	5	Ctss
2.11273e-41	1.08257	0.846	0.591	2.8055e-37	5	Tyrobp
5.21294e-41	1.31555	0.833	0.661	6.92227e-37	5	Lgals1
1.48341e-40	-0.930741	0.123	0.645	1.96982e-36	5	Rgs10
1.857e-40	-1.24662	0.25	0.739	2.46591e-36	5	Gpx1
9.1716e-38	-3.08655	0.057	0.51	1.2179e-33	5	Lyz2
4.24709e-37	-1.56776	0.167	0.65	5.63971e-33	5	Ifi27l2a
2.47681e-35	-2.0913	0.009	0.45	3.28895e-31	5	Ifitm3
9.09997e-34	-0.8116	0.355	0.831	1.20839e-29	5	Npc2
1.70898e-33	-1.18211	0.211	0.65	2.26935e-29	5	Psap
4.47753e-33	-1.34543	0.013	0.433	5.94572e-29	5	Alox5ap
2.04154e-32	0.549651	0.982	0.973	2.71096e-28	5	Pfn1
7.95684e-32	-0.337399	0.996	0.998	1.05659e-27	5	Rps29
2.61495e-31	-1.10275	0.009	0.41	3.47239e-27	5	Ctsh
2.8986e-31	-1.11509	0.039	0.459	3.84905e-27	5	H2-DMa
3.02933e-31	-2.30424	0.026	0.428	4.02265e-27	5	Ccl6
1.29631e-30	-1.7547	0.013	0.408	1.72137e-26	5	Mt1
8.52639e-30	0.967453	0.702	0.483	1.13222e-25	5	Trbc1
1.13222e-29	-1.53313	0.066	0.472	1.50348e-25	5	Ctsb
1.49908e-29	-1.6341	0.009	0.395	1.99063e-25	5	Ccl9
6.18751e-29	-2.4888	0.035	0.416	8.21639e-25	5	Wfdc17
7.45802e-29	-0.91818	0.057	0.458	9.90351e-25	5	Ctsz
7.47449e-29	1.01006	0.711	0.581	9.92537e-25	5	Hcst
3.49385e-28	0.632101	0.846	0.8	4.63948e-24	5	Rac2
3.67774e-28	0.276895	1	1	4.88367e-24	5	Tmsb4x
1.52225e-27	-1.00493	0.009	0.373	2.0214e-23	5	Spi1
3.29416e-27	-1.01866	0.013	0.379	4.37432e-23	5	Marcks
2.34237e-26	-1.32943	0.026	0.389	3.11043e-22	5	Ifitm2
8.15682e-26	-1.05342	0.022	0.374	1.08314e-21	5	Pid1
8.85168e-26	-0.935818	0.083	0.46	1.17542e-21	5	Gm2a
6.22994e-25	1.21727	0.553	0.359	8.27273e-21	5	Txk
1.49206e-24	-0.695936	0.816	0.982	1.98131e-20	5	Fth1
3.45218e-24	-0.906578	0.004	0.333	4.58415e-20	5	Pld4
4.23914e-24	-0.402038	0.886	0.984	5.62915e-20	5	Rps28
9.87694e-24	-0.926803	0.048	0.401	1.31156e-19	5	Tmem176b
1.28874e-22	0.791951	0.754	0.527	1.71131e-18	5	Fcer1g
1.73992e-22	1.40363	0.478	0.275	2.31045e-18	5	Cd7
2.64468e-22	-0.839302	0.162	0.55	3.51187e-18	5	Ighm
2.65221e-22	-0.65921	0.018	0.337	3.52187e-18	5	Rassf4
5.60161e-22	-0.868974	0.009	0.314	7.43838e-18	5	H2-DMb1
1.10939e-21	-1.0663	0.009	0.313	1.47316e-17	5	Grn
1.1396e-21	-1.09747	0.013	0.319	1.51328e-17	5	Cfp
2.06092e-21	-0.929341	0.013	0.316	2.7367e-17	5	Cd81
9.19398e-21	-3.49233	0.061	0.363	1.22087e-16	5	Retnla
9.94981e-21	0.473281	0.877	0.904	1.32124e-16	5	Myl6
1.08166e-20	-0.59439	0.101	0.447	1.43633e-16	5	Zfp36
1.11671e-20	-0.453194	0.158	0.544	1.48288e-16	5	Atpif1
1.96412e-20	0.394716	0.996	0.917	2.60815e-16	5	Tmsb10
2.16437e-20	1.07537	0.601	0.447	2.87406e-16	5	Id2
2.23139e-20	-0.52384	0.175	0.545	2.96307e-16	5	Tuba1b
4.8873e-20	-0.368434	0.167	0.558	6.48984e-16	5	Gltp
5.15482e-20	-1.11961	0.004	0.287	6.84508e-16	5	Clec10a
6.19344e-20	-0.519729	0.145	0.511	8.22426e-16	5	Erp29
7.21882e-20	-0.99075	0.018	0.306	9.58587e-16	5	Trf
2.63614e-19	-0.620326	0.053	0.356	3.50054e-15	5	Creg1
3.26446e-19	-3.51533	0.044	0.33	4.33487e-15	5	Apoe
5.71754e-19	-0.634717	0.061	0.371	7.59232e-15	5	Hexa
1.46785e-18	-0.433907	0.189	0.558	1.94915e-14	5	Akr1a1
1.51607e-18	-1.14246	0.132	0.469	2.01319e-14	5	Gm42418
1.93034e-18	-0.63352	0.022	0.297	2.5633e-14	5	Ncf2
1.94513e-18	-0.642772	0.026	0.304	2.58294e-14	5	Unc93b1
2.32978e-18	-0.647369	0.092	0.405	3.09372e-14	5	Dusp1
2.3643e-18	0.865806	0.671	0.586	3.13955e-14	5	Ptprcap
2.42773e-18	-0.371323	0.114	0.454	3.22379e-14	5	Samhd1
4.34431e-18	-0.253501	0.965	0.994	5.76881e-14	5	Rps9
8.86996e-18	-0.698414	0.298	0.653	1.17784e-13	5	Lsp1
9.55079e-18	-0.557453	0.026	0.299	1.26825e-13	5	Kctd12
1.43495e-17	-0.784955	0.044	0.321	1.90546e-13	5	Mef2c
2.22721e-17	1.14571	0.535	0.411	2.95751e-13	5	Gimap4
2.62933e-17	-0.501128	0.066	0.356	3.49149e-13	5	Cltc
2.80236e-17	-0.37376	0.816	0.968	3.72125e-13	5	Rps20
4.22022e-17	-0.61675	0.009	0.256	5.60404e-13	5	Batf3
4.83608e-17	0.339921	0.965	0.987	6.42183e-13	5	H2-D1
5.64845e-17	-0.445535	0.14	0.468	7.50058e-13	5	Ybx1
6.06338e-17	-0.634467	0.092	0.384	8.05156e-13	5	Ccr7
6.17148e-17	-0.621798	0.013	0.262	8.1951e-13	5	App
0	2.13807	0.847	0.015	0	6	Pclaf
0	1.42543	0.667	0.007	0	6	Birc5
3.2474e-307	1.26277	0.6	0.008	4.31222e-303	6	Rrm2
2.23639e-303	1.27869	0.633	0.012	2.9697e-299	6	Mki67
7.57517e-285	1.67592	0.727	0.025	1.00591e-280	6	Top2a
5.06798e-282	1.07157	0.493	0.004	6.72977e-278	6	Nusap1
3.40487e-278	1.41427	0.507	0.005	4.52133e-274	6	Ube2c
1.0104e-271	0.810863	0.467	0.003	1.34171e-267	6	Ccna2
3.626e-259	1.25467	0.507	0.007	4.81496e-255	6	Hist1h1b
8.51287e-250	1.06852	0.487	0.007	1.13042e-245	6	Cenpf
4.02252e-244	0.901373	0.5	0.008	5.34151e-240	6	Prc1
3.73351e-236	1.87099	0.907	0.071	4.95773e-232	6	Stmn1
1.51277e-235	0.931185	0.487	0.008	2.00881e-231	6	Ccnb2
1.69075e-201	0.831669	0.42	0.007	2.24515e-197	6	Cenpe
4.03772e-198	0.687042	0.42	0.008	5.36169e-194	6	Spc24
1.53206e-197	0.657361	0.407	0.007	2.03442e-193	6	Hist1h2ak
1.55626e-193	0.438939	0.327	0.002	2.06655e-189	6	Esco2
2.36895e-193	0.698064	0.407	0.007	3.14573e-189	6	Cdca3
3.81232e-190	1.27948	0.78	0.065	5.06238e-186	6	Cks1b
9.00059e-190	0.586515	0.427	0.009	1.19519e-185	6	Cenpm
2.21544e-180	0.664031	0.3	0.001	2.94189e-176	6	Hmmr
1.52563e-176	0.533109	0.327	0.003	2.02589e-172	6	Ckap2l
7.08709e-174	0.607933	0.36	0.006	9.41095e-170	6	Tpx2
1.87139e-165	0.868628	0.5	0.023	2.48502e-161	6	Cdca8
2.46052e-161	0.427073	0.293	0.003	3.26733e-157	6	Aspm
1.3032e-160	0.482838	0.367	0.008	1.73052e-156	6	Kif15
1.60045e-159	0.487372	0.353	0.007	2.12523e-155	6	Hist1h2ap
2.3266e-159	0.541801	0.36	0.008	3.0895e-155	6	Tk1
1.03931e-156	0.434618	0.287	0.003	1.3801e-152	6	Kif11
5.41358e-153	0.861589	0.453	0.02	7.18869e-149	6	Lockd
5.16717e-151	0.436261	0.267	0.002	6.86148e-147	6	Pbk
7.14502e-150	0.486823	0.28	0.003	9.48787e-146	6	Mxd3
5.59294e-142	0.419164	0.273	0.003	7.42687e-138	6	Knl1
2.15041e-140	0.330397	0.267	0.003	2.85553e-136	6	Ska1
2.2548e-140	0.787421	0.387	0.014	2.99414e-136	6	Hist1h2ae
6.63273e-137	0.629551	0.42	0.019	8.8076e-133	6	Asf1b
1.07505e-134	0.632794	0.4	0.017	1.42756e-130	6	Uhrf1
2.19127e-134	0.461982	0.28	0.005	2.90978e-130	6	Cep55
1.79395e-125	0.657321	0.327	0.011	2.38218e-121	6	Cdc20
1.79444e-124	0.563944	0.287	0.007	2.38284e-120	6	Cdk1
9.80341e-123	0.526176	0.34	0.013	1.3018e-118	6	Clspn
6.73866e-114	0.787896	0.527	0.046	8.94827e-110	6	Lig1
2.35555e-112	0.447246	0.28	0.008	3.12794e-108	6	Spc25
6.56548e-112	0.646242	0.427	0.028	8.7183e-108	6	Knstrn
1.61227e-111	0.854913	0.6	0.066	2.14093e-107	6	Gmnn
5.96748e-111	0.782807	0.533	0.049	7.92422e-107	6	Hells
5.90099e-110	0.596288	0.433	0.03	7.83593e-106	6	Cenpw
3.56293e-108	1.07111	0.713	0.103	4.73122e-104	6	Smc2
1.93454e-107	1.12623	0.627	0.078	2.56888e-103	6	Cks2
2.70083e-104	1.22468	0.767	0.133	3.58643e-100	6	Dut
9.6333e-104	0.675096	0.367	0.021	1.27921e-99	6	Tcf19
1.42066e-103	0.522783	0.407	0.027	1.8865e-99	6	Dtl
1.0534e-97	1.3136	0.62	0.087	1.39881e-93	6	Hist1h1e
2.65818e-97	0.430936	0.3	0.014	3.5298e-93	6	Cenps
9.05953e-95	0.845845	0.68	0.104	1.20301e-90	6	Ezh2
1.07453e-94	0.348036	0.267	0.01	1.42687e-90	6	Mis18bp1
1.09294e-94	0.563273	0.453	0.041	1.45132e-90	6	Lmnb1
3.50017e-94	2.19678	0.96	0.371	4.64787e-90	6	Hmgb2
6.98296e-94	0.574866	0.453	0.041	9.27268e-90	6	Mcm5
1.17848e-93	0.852478	0.68	0.105	1.5649e-89	6	Tipin
4.20426e-92	0.429298	0.32	0.018	5.58284e-88	6	Fbxo5
7.17069e-91	0.539696	0.28	0.013	9.52196e-87	6	Aurkb
4.95129e-86	0.485593	0.34	0.023	6.57482e-82	6	Hmgb3
4.23406e-82	0.531792	0.353	0.027	5.62241e-78	6	Tyms
2.20639e-78	1.1811	0.867	0.247	2.92986e-74	6	Hmgn2
2.48746e-75	1.1029	1	0.941	3.3031e-71	6	Ptma
8.32606e-75	0.407188	0.287	0.019	1.10562e-70	6	Kif20b
3.71557e-70	1.06315	0.887	0.279	4.93391e-66	6	Selenoh
1.89967e-68	0.435232	0.3	0.024	2.52257e-64	6	Mad2l1
4.4192e-67	1.46566	0.947	0.496	5.86825e-63	6	Tuba1b
6.27178e-67	0.527981	0.393	0.045	8.3283e-63	6	Mcm6
3.70416e-64	0.424965	0.3	0.026	4.91876e-60	6	Syce2
1.99616e-63	0.455095	0.407	0.051	2.6507e-59	6	Psat1
5.79e-62	1.11575	0.573	0.116	7.68855e-58	6	H2afx
1.56501e-61	0.711763	0.567	0.105	2.07817e-57	6	Ccdc34
2.13935e-60	0.387827	0.38	0.046	2.84084e-56	6	Rfc5
4.75877e-60	1.14435	0.987	0.802	6.31916e-56	6	H2afz
5.05147e-60	0.449248	0.333	0.035	6.70785e-56	6	Hist1h4d
6.55954e-60	0.445123	0.393	0.05	8.71041e-56	6	Mcm3
7.41261e-60	0.461965	0.353	0.041	9.84321e-56	6	Rrm1
1.75571e-59	-0.944591	1	0.999	2.3314e-55	6	Malat1
2.03375e-58	0.335432	0.267	0.022	2.70061e-54	6	Gins2
7.91054e-58	0.498155	0.373	0.047	1.05044e-53	6	Racgap1
1.03122e-55	1.02809	0.967	0.574	1.36936e-51	6	Ran
2.07748e-55	0.50059	0.44	0.069	2.75868e-51	6	Nsd2
9.34843e-55	0.755669	0.587	0.131	1.24138e-50	6	Phgdh
5.3103e-54	0.954649	0.987	0.705	7.05155e-50	6	Gapdh
6.82186e-53	0.360656	0.32	0.037	9.05874e-49	6	Tfdp1
7.74253e-53	0.867809	0.9	0.358	1.02813e-48	6	Dek
4.93731e-52	0.274083	0.28	0.028	6.55625e-48	6	Cdca7
5.14152e-51	0.668354	0.513	0.101	6.82743e-47	6	Pttg1
2.00673e-50	0.509287	0.42	0.068	2.66473e-46	6	Dbf4
9.66714e-50	0.362186	0.3	0.035	1.2837e-45	6	Mcm2
1.55937e-49	0.511647	0.493	0.096	2.07069e-45	6	Atad2
1.24925e-48	0.350016	0.28	0.031	1.65888e-44	6	Plk4
6.37849e-48	0.784895	0.473	0.093	8.46999e-44	6	Ikzf2
1.30591e-47	1.03268	0.547	0.135	1.73412e-43	6	Cenpa
1.75417e-47	0.331421	0.307	0.038	2.32937e-43	6	Orc6
2.9151e-47	0.832967	0.98	0.75	3.87097e-43	6	Rbm3
1.06817e-46	1.20103	0.973	0.691	1.41843e-42	6	Tubb5
6.26745e-308	0.982968	0.694	0.014	8.32254e-304	7	Sept3
4.84683e-305	1.09916	0.573	0.006	6.43611e-301	7	Xcr1
1.45124e-227	0.824417	0.492	0.008	1.92711e-223	7	Tlr3
5.71422e-209	0.703693	0.444	0.007	7.58791e-205	7	A530099J19Rik
3.32499e-183	0.49963	0.315	0.002	4.41526e-179	7	Gcsam
2.46748e-182	0.488521	0.355	0.004	3.27657e-178	7	Clec9a
5.32426e-181	1.9154	0.976	0.115	7.07008e-177	7	Naaa
1.61901e-134	0.725217	0.444	0.02	2.14988e-130	7	Ifi205
2.49856e-125	0.963272	0.758	0.083	3.31784e-121	7	Pak1
4.80751e-119	0.869574	0.581	0.047	6.38389e-115	7	Rtl8b
1.03369e-118	0.976698	0.927	0.138	1.37264e-114	7	Cd24a
2.18521e-118	0.850594	0.613	0.053	2.90174e-114	7	Rab7b
1.18671e-116	0.776056	0.589	0.051	1.57583e-112	7	Naga
3.27442e-110	1.48013	0.984	0.195	4.3481e-106	7	Irf8
2.10873e-105	1.55184	0.903	0.177	2.80019e-101	7	Plbd1
2.30651e-101	1.041	0.629	0.07	3.06282e-97	7	Rtl8a
8.19891e-96	0.759327	0.532	0.052	1.08873e-91	7	Wdfy4
5.10344e-95	0.656425	0.524	0.049	6.77686e-91	7	Btla
2.43996e-92	0.689764	0.548	0.055	3.24002e-88	7	Tnni2
1.34442e-91	0.439473	0.339	0.018	1.78525e-87	7	Pbx1
6.61335e-91	0.75756	0.597	0.069	8.78187e-87	7	Pkib
1.15086e-90	0.713319	0.548	0.058	1.52822e-86	7	Ece1
1.52765e-90	1.2717	0.847	0.166	2.02857e-86	7	Ppt1
3.4376e-83	0.826403	0.661	0.095	4.56479e-79	7	Jaml
6.08446e-78	0.663454	0.629	0.088	8.07955e-74	7	Fgd2
1.30907e-69	0.68931	0.605	0.096	1.73831e-65	7	Sdad1
7.19792e-65	1.81604	1	0.683	9.55811e-61	7	Cst3
1.24335e-63	0.584463	0.435	0.053	1.65105e-59	7	Hepacam2
5.10389e-63	0.938671	0.823	0.21	6.77745e-59	7	Mpeg1
4.90946e-62	0.76076	0.702	0.14	6.51928e-58	7	Rnase6
1.76855e-60	0.56296	0.403	0.045	2.34845e-56	7	Cadm1
3.03736e-57	0.376059	0.282	0.022	4.03331e-53	7	P2ry14
1.72479e-52	0.676787	0.565	0.106	2.29035e-48	7	BC028528
1.43017e-51	0.403821	0.306	0.031	1.89912e-47	7	Mctp1
2.44616e-49	0.829239	0.782	0.221	3.24826e-45	7	Cbfa2t3
1.32563e-48	0.475163	0.395	0.056	1.7603e-44	7	Cdk14
4.79461e-47	0.617353	0.605	0.132	6.36676e-43	7	Plp2
5.04703e-44	1.04076	1	0.569	6.70195e-40	7	H2-Aa
1.45348e-39	0.649843	0.476	0.1	1.93008e-35	7	Shtn1
4.05683e-38	0.522493	0.419	0.079	5.38706e-34	7	Fgl2
7.83784e-38	0.492505	0.556	0.13	1.04079e-33	7	Arsb
1.52937e-35	0.377913	0.315	0.047	2.03085e-31	7	Rab32
1.72617e-35	0.881678	1	0.537	2.29218e-31	7	H2-Ab1
1.50622e-34	0.404248	0.306	0.047	2.00011e-30	7	Tbc1d9
2.82679e-34	0.741962	0.952	0.406	3.7537e-30	7	H2-DMa
3.12082e-34	0.555355	0.5	0.121	4.14414e-30	7	Camk1d
2.25344e-33	0.605631	0.718	0.242	2.99234e-29	7	Fnbp1
2.28035e-33	0.372199	0.371	0.069	3.02808e-29	7	Ppfia4
2.79241e-33	0.760532	0.992	0.602	3.70805e-29	7	Psap
1.22678e-31	0.749971	0.992	0.628	1.62904e-27	7	Atox1
6.9881e-31	0.3919	1	0.99	9.27949e-27	7	Rps11
2.22255e-30	0.349044	0.452	0.104	2.95133e-26	7	Pglyrp1
9.53268e-30	0.279911	0.298	0.048	1.26585e-25	7	Ckb
1.74515e-28	0.699413	1	0.633	2.31738e-24	7	Cd74
2.05533e-28	0.63256	0.927	0.439	2.72928e-24	7	Id2
2.17395e-28	0.597751	0.75	0.272	2.88679e-24	7	H2-DMb1
3.04995e-28	0.75291	0.895	0.413	4.05002e-24	7	Gm2a
7.64197e-27	0.630422	0.573	0.187	1.01478e-22	7	Trim35
8.99968e-27	0.508211	0.573	0.177	1.19507e-22	7	Unc119
1.74065e-26	0.303676	0.355	0.073	2.31141e-22	7	Clec12a
1.8967e-25	0.350787	0.274	0.049	2.51863e-21	7	Ccnd1
2.42089e-25	0.561024	0.677	0.252	3.21471e-21	7	Man2b1
3.04506e-25	0.266758	0.323	0.065	4.04354e-21	7	BC035044
3.37424e-25	0.57578	0.895	0.381	4.48065e-21	7	Alox5ap
1.18212e-24	0.365988	0.419	0.11	1.56973e-20	7	Ptms
1.52751e-23	0.401446	0.637	0.222	2.02838e-19	7	Batf3
2.57205e-23	0.255589	0.298	0.061	3.41543e-19	7	Gna15
7.29608e-23	0.521198	0.992	0.796	9.68847e-19	7	Eef1b2
5.84089e-22	0.434036	0.476	0.147	7.75612e-18	7	Anxa1
1.65517e-21	0.404046	0.548	0.19	2.1979e-17	7	Txndc15
2.31969e-21	0.354689	0.597	0.216	3.08032e-17	7	Napsa
3.99048e-21	0.321628	0.411	0.116	5.29896e-17	7	Rala
4.23182e-21	0.297187	0.427	0.122	5.61944e-17	7	H2-Oa
6.27667e-21	0.529526	0.645	0.262	8.33479e-17	7	Fuca1
1.05257e-20	0.306484	1	0.984	1.39771e-16	7	Rps5
1.75734e-19	0.37325	0.452	0.145	2.33357e-15	7	Cpne3
1.94682e-19	0.253793	1	0.992	2.58518e-15	7	Rps9
3.13527e-19	0.298921	0.363	0.098	4.16333e-15	7	Parp8
4.81862e-19	0.46462	0.685	0.306	6.39865e-15	7	Sept6
5.94409e-19	0.321972	0.484	0.164	7.89315e-15	7	Alcam
1.18197e-18	0.334487	0.968	0.612	1.56953e-14	7	Lsp1
1.43996e-18	0.276633	1	0.993	1.91212e-14	7	Rpl18a
3.22449e-18	0.397127	0.435	0.143	4.28181e-14	7	Ciita
4.63627e-18	0.330319	0.484	0.169	6.1565e-14	7	Sh3bp1
4.76424e-18	0.352731	0.452	0.151	6.32643e-14	7	Arhgap5
5.495e-18	0.294641	0.468	0.161	7.2968e-14	7	Ivns1abp
6.27921e-18	0.322213	0.379	0.116	8.33816e-14	7	Bri3bp
1.84813e-17	0.44189	0.637	0.268	2.45414e-13	7	Itgb7
1.86133e-17	0.292961	0.427	0.142	2.47166e-13	7	Srebf2
4.26614e-17	0.305226	1	0.954	5.665e-13	7	Rpl3
1.06976e-16	0.268772	1	0.982	1.42053e-12	7	Rps6
1.08649e-16	0.268999	1	0.983	1.44275e-12	7	Rpl14
1.36034e-16	0.295304	1	0.973	1.8064e-12	7	Rplp0
4.20832e-16	0.332086	0.516	0.204	5.58822e-12	7	Inpp5d
5.90652e-16	0.365134	0.274	0.072	7.84327e-12	7	Txndc16
4.41519e-15	0.332326	0.419	0.148	5.86293e-11	7	Adrb2
5.2152e-15	0.266254	0.653	0.283	6.92526e-11	7	St8sia4
5.33472e-15	0.349458	0.613	0.278	7.08397e-11	7	Commd8
8.04775e-15	0.330463	0.5	0.199	1.06866e-10	7	Plekho1
1.47632e-14	0.312986	0.766	0.387	1.96041e-10	7	Ppp1r11
0	2.59089	0.982	0.013	0	8	Siglech
0	2.13836	0.782	0.004	0	8	Cox6a2
0	2.0649	0.745	0.006	0	8	Klk1b27
0	1.962	0.764	0.003	0	8	Klk1
1.56683e-272	1.16682	0.455	0.001	2.08059e-268	8	Gm21762
1.42787e-183	1.09508	0.418	0.004	1.89607e-179	8	Lefty1
1.30125e-165	1.78641	0.673	0.02	1.72794e-161	8	Slpi
1.18836e-161	0.737471	0.273	0.001	1.57803e-157	8	Hs3st1
6.92671e-146	0.746629	0.327	0.003	9.19798e-142	8	Atp2a1
6.27468e-145	1.05904	0.436	0.008	8.33215e-141	8	Cd300c
8.63725e-121	1.00158	0.364	0.007	1.14694e-116	8	Klra17
4.36694e-119	0.691543	0.255	0.002	5.79886e-115	8	Gm14964
2.18213e-115	1.25261	0.564	0.023	2.89765e-111	8	P2ry14
6.87758e-109	1.33823	0.673	0.037	9.13274e-105	8	Runx2
1.30036e-101	1.47939	0.709	0.047	1.72675e-97	8	Lair1
3.63928e-91	0.855995	0.255	0.004	4.8326e-87	8	Pir
3.36387e-90	1.72787	0.909	0.09	4.46688e-86	8	Iglc3
4.32269e-87	1.70571	0.691	0.054	5.7401e-83	8	Smim5
3.3464e-85	1.91477	0.927	0.111	4.44369e-81	8	Tcf4
4.79223e-78	2.11038	0.982	0.148	6.36361e-74	8	Rnase6
1.65667e-73	1.54402	0.691	0.063	2.19989e-69	8	Ctsl
8.17579e-69	2.21905	1	0.171	1.08566e-64	8	Plac8
2.92763e-64	1.14201	0.582	0.05	3.88759e-60	8	Cadm1
3.76883e-62	2.79396	0.982	0.221	5.00463e-58	8	Bst2
1.29559e-60	2.23125	1	0.213	1.72041e-56	8	Irf8
4.72944e-60	1.33407	0.673	0.074	6.28022e-56	8	Clec12a
8.35542e-60	1.9478	0.927	0.161	1.10952e-55	8	Ly6c2
1.56322e-56	1.90093	0.945	0.169	2.07579e-52	8	Ly6d
2.54181e-48	1.43047	0.745	0.114	3.37528e-44	8	Cd209d
2.12773e-46	0.947103	0.382	0.029	2.82541e-42	8	Kmo
2.3708e-44	1.09443	0.545	0.066	3.14819e-40	8	Tubgcp5
5.42666e-44	1.26857	0.673	0.104	7.20607e-40	8	Bcl11a
1.48261e-43	1.30909	0.582	0.078	1.96876e-39	8	Ccr9
2.55946e-39	0.840976	0.418	0.042	3.39871e-35	8	Rnf122
6.66606e-39	0.844592	0.455	0.049	8.85186e-35	8	Spib
3.95657e-37	1.61819	0.909	0.29	5.25393e-33	8	Dnajc7
1.70309e-35	1.32499	0.727	0.157	2.26153e-31	8	Atp1b1
3.23288e-35	1.32039	0.855	0.223	4.29295e-31	8	Mpeg1
9.16937e-35	1.03284	0.509	0.073	1.2176e-30	8	Ppfia4
9.56626e-35	0.761628	0.418	0.047	1.2703e-30	8	Cxxc5
1.66761e-33	1.04366	0.509	0.075	2.21442e-29	8	Nucb2
1.59842e-32	1.27775	0.582	0.101	2.12254e-28	8	Ly6a
2.23027e-30	1.05044	0.582	0.112	2.96157e-26	8	Pacsin1
2.53451e-30	1.09925	0.927	0.279	3.36557e-26	8	Grn
3.01841e-30	0.951777	1	0.953	4.00814e-26	8	Rpl31
9.63887e-30	0.703854	0.291	0.027	1.27995e-25	8	Mctp2
2.63708e-29	1.11365	0.564	0.1	3.50178e-25	8	Sdc4
6.53827e-29	1.59625	1	0.603	8.68217e-25	8	Tyrobp
1.81856e-28	0.802358	0.473	0.074	2.41486e-24	8	Fgr
5.63803e-28	0.722802	0.364	0.043	7.48675e-24	8	Prr5
6.4785e-28	0.953976	0.436	0.063	8.6028e-24	8	Mzb1
1.98663e-27	1.09468	0.473	0.079	2.63805e-23	8	Gm5547
3.00732e-26	0.578316	0.273	0.026	3.99342e-22	8	Cd300lf
3.91284e-25	1.06162	1	0.513	5.19586e-21	8	Ighm
1.35941e-24	0.543319	0.255	0.024	1.80516e-20	8	Fcrla
6.94459e-24	0.646205	0.327	0.042	9.22173e-20	8	Cdc14b
8.41195e-24	0.662303	0.436	0.072	1.11702e-19	8	Hhex
9.40337e-24	1.17655	0.927	0.465	1.24867e-19	8	Serp1
6.53799e-23	0.67769	0.364	0.053	8.68179e-19	8	Scimp
7.67236e-23	0.959033	0.509	0.108	1.01881e-18	8	Edem2
2.77286e-22	0.839305	1	0.969	3.68208e-18	8	Fth1
4.1294e-22	1.07518	0.673	0.207	5.48343e-18	8	Bmyc
5.66631e-22	0.978788	0.582	0.148	7.5243e-18	8	Tnfrsf13b
1.1323e-21	1.11126	0.818	0.335	1.50358e-17	8	Ramp1
2.33896e-21	0.645192	0.327	0.047	3.1059e-17	8	Snx18
3.9449e-21	1.09109	0.873	0.416	5.23844e-17	8	Smim14
1.09585e-20	0.67792	0.345	0.054	1.45519e-16	8	Tsc22d1
1.72075e-20	0.815892	1	0.888	2.28499e-16	8	Xist
3.07306e-20	0.500854	0.255	0.03	4.08071e-16	8	Gapt
6.31352e-20	0.904016	0.709	0.225	8.38372e-16	8	Cybb
1.82926e-19	0.996306	0.873	0.372	2.42907e-15	8	Ctsh
2.50474e-19	0.95791	0.8	0.291	3.32605e-15	8	Mef2c
2.88644e-19	0.979762	0.836	0.397	3.8329e-15	8	Tspan13
5.4264e-19	0.809029	0.345	0.06	7.20571e-15	8	Upb1
5.7271e-19	0.653775	0.327	0.053	7.60502e-15	8	Ldhb
6.04351e-19	0.733303	0.418	0.084	8.02518e-15	8	Pkib
1.15158e-18	0.92987	0.509	0.12	1.52919e-14	8	Cd209a
3.8657e-18	0.486237	1	0.979	5.13327e-14	8	Rpl10
4.51758e-18	1.10056	0.909	0.53	5.9989e-14	8	Hsp90b1
1.58135e-17	0.692127	0.545	0.147	2.09987e-13	8	Pkig
4.20097e-17	0.764954	0.527	0.14	5.57847e-13	8	Ly86
3.58419e-16	0.906686	0.982	0.718	4.75945e-12	8	Ly6e
4.82653e-16	0.868448	0.927	0.748	6.40915e-12	8	Mbnl1
6.44163e-16	0.847664	0.709	0.291	8.55384e-12	8	St8sia4
1.17505e-15	0.787156	0.673	0.26	1.56035e-11	8	Cyth4
1.23868e-15	0.772219	0.673	0.259	1.64485e-11	8	Tmed3
1.5448e-15	0.658963	0.455	0.116	2.05134e-11	8	Pafah1b3
2.91056e-15	0.839717	0.782	0.355	3.86493e-11	8	Sell
3.45713e-15	0.732009	0.436	0.112	4.59073e-11	8	Jaml
5.6537e-15	0.63819	0.473	0.128	7.50755e-11	8	H2-Oa
1.38724e-14	0.778206	0.382	0.09	1.84212e-10	8	Rhno1
1.6743e-14	0.742124	0.891	0.393	2.2233e-10	8	Alox5ap
3.49737e-14	0.444867	0.345	0.072	4.64416e-10	8	Abhd17b
4.06327e-14	0.700408	0.364	0.084	5.39561e-10	8	Rell1
4.19152e-14	0.603985	0.255	0.043	5.56592e-10	8	Rab33b
4.99515e-14	0.869768	0.855	0.479	6.63306e-10	8	Pgls
2.48628e-13	0.761959	0.709	0.302	3.30153e-09	8	Pld4
3.17629e-13	0.858857	0.782	0.388	4.2178e-09	8	Manf
3.41375e-13	0.683521	0.764	0.326	4.53312e-09	8	Ccr2
4.41459e-13	0.391709	0.891	0.434	5.86213e-09	8	Ctsb
0	4.31967	1	0.004	0	9	Ptn
0	3.4061	0.97	0.006	0	9	Prlr
0	2.71789	1	0.007	0	9	Krt18
0	2.48607	0.939	0.001	0	9	Wfdc2
0	2.39717	0.97	0.004	0	9	Krt19
0	2.30504	0.939	0.001	0	9	Fam25c
0	2.13827	0.667	0.003	0	9	Areg
0	2.04449	0.97	0.001	0	9	Krt8
0	2.02545	0.788	0.006	0	9	Bhlhe41
0	2.01867	0.97	0.002	0	9	Tmem56
0	1.8147	0.848	0.005	0	9	Cdo1
0	1.80986	0.758	0.001	0	9	Cited1
0	1.67918	1	0.011	0	9	Epcam
0	1.66492	0.818	0.002	0	9	Slc7a2
0	1.64696	0.879	0.002	0	9	Samd5
0	1.63002	0.727	0.002	0	9	Fxyd3
0	1.56346	0.848	0	0	9	Pgr
0	1.4596	0.697	0	0	9	Col8a1
0	1.43016	0.636	0	0	9	Cxcl15
0	1.41039	0.667	0	0	9	Clca3a2
0	1.39446	0.848	0	0	9	Foxa1
0	1.36699	0.818	0	0	9	Cldn3
0	1.29767	0.788	0.002	0	9	Gipc2
0	1.17895	0.758	0.002	0	9	Krt7
0	1.16817	0.727	0.003	0	9	Nfib
0	1.16676	0.758	0.001	0	9	Fgfr2
0	1.16513	0.727	0.001	0	9	9530014B07Rik
0	1.15785	0.727	0.001	0	9	Urah
0	1.14251	0.727	0.002	0	9	Cmtm8
0	1.12196	0.697	0.001	0	9	Tmprss2
0	1.12003	0.667	0	0	9	Slc5a5
0	1.01234	0.788	0	0	9	Rab25
0	1.00637	0.636	0	0	9	Mlph
0	0.986775	0.697	0.001	0	9	Smim22
0	0.982998	0.545	0	0	9	Sox9
0	0.962239	0.606	0.001	0	9	Podxl
0	0.849595	0.606	0.001	0	9	Msx2
0	0.767496	0.485	0	0	9	Ano1
0	0.761471	0.545	0.001	0	9	Wnt5a
0	0.756701	0.576	0.001	0	9	Tfap2b
0	0.746432	0.515	0.001	0	9	Inhbb
0	0.727653	0.485	0	0	9	Cd164l2
0	0.585619	0.515	0	0	9	Fat1
2.56581e-306	1.02634	0.576	0.002	3.40714e-302	9	Rbms3
8.03787e-303	1.12841	0.606	0.002	1.06735e-298	9	Cldn7
3.63812e-294	0.743299	0.576	0.002	4.83105e-290	9	Cttn
8.95947e-288	1.17208	0.545	0.002	1.18973e-283	9	Map1b
2.7708e-286	0.528393	0.424	0	3.67935e-282	9	Cysrt1
1.09492e-279	0.931715	0.636	0.004	1.45394e-275	9	Enho
6.27673e-270	0.750297	0.455	0.001	8.33487e-266	9	Aqp5
3.61327e-267	0.691585	0.424	0	4.79807e-263	9	Prom1
6.659e-266	0.643307	0.394	0	8.84249e-262	9	Cxcl17
6.659e-266	0.628919	0.394	0	8.84249e-262	9	Rassf9
7.15377e-247	0.674442	0.394	0	9.49949e-243	9	Gm32014
7.15377e-247	0.563616	0.394	0	9.49949e-243	9	5930412G12Rik
1.5573e-245	1.08179	0.364	0	2.06794e-241	9	Tph1
1.5573e-245	0.715846	0.364	0	2.06794e-241	9	Rasef
1.5573e-245	0.546409	0.364	0	2.06794e-241	9	Piezo2
1.5573e-245	0.509896	0.364	0	2.06794e-241	9	A830008E24Rik
1.5573e-245	0.462947	0.364	0	2.06794e-241	9	Spint1
7.93367e-237	0.738835	0.485	0.002	1.05351e-232	9	Fxyd6
7.07115e-235	0.638517	0.424	0.001	9.38977e-231	9	Arg1
2.35577e-230	0.641348	0.394	0.001	3.12823e-226	9	Prr15l
3.99181e-230	0.551188	0.394	0.001	5.30073e-226	9	Nrxn3
1.12878e-226	2.68487	1	0.022	1.49891e-222	9	Gpx3
3.54589e-225	0.632296	0.333	0	4.70859e-221	9	Snhg11
3.54589e-225	0.546076	0.333	0	4.70859e-221	9	Cyp3a57
3.54589e-225	0.544095	0.333	0	4.70859e-221	9	Lama5
3.54589e-225	0.464184	0.333	0	4.70859e-221	9	Esrp1
3.54589e-225	0.375211	0.333	0	4.70859e-221	9	Gm16485
3.54589e-225	0.347231	0.333	0	4.70859e-221	9	Irx3
4.09002e-224	2.52791	0.97	0.021	5.43114e-220	9	Slc12a2
9.94691e-216	0.576751	0.394	0.001	1.32085e-211	9	Cldn4
1.27349e-215	0.519219	0.394	0.001	1.69107e-211	9	Dsp
1.84317e-214	0.958324	0.576	0.005	2.44755e-210	9	S100a16
2.02938e-206	1.75393	0.97	0.023	2.69481e-202	9	Cystm1
2.58389e-206	0.413867	0.333	0	3.43115e-202	9	Cxadr
3.81739e-206	0.594402	0.333	0	5.06911e-202	9	Hs3st6
4.03621e-206	0.46369	0.333	0	5.35968e-202	9	Mal2
7.86619e-205	0.568654	0.303	0	1.04455e-200	9	Fgg
7.86619e-205	0.466465	0.303	0	1.04455e-200	9	Prom2
7.86619e-205	0.3744	0.303	0	1.04455e-200	9	1700023F06Rik
7.86619e-205	0.332408	0.303	0	1.04455e-200	9	Crym
9.13763e-202	0.895917	0.515	0.004	1.21339e-197	9	Tm4sf1
4.36833e-199	1.55695	0.909	0.02	5.8007e-195	9	Kitl
2.43255e-196	2.25403	0.97	0.025	3.23018e-192	9	Stc2
4.06397e-196	0.526797	0.364	0.001	5.39654e-192	9	Lmo7
7.31269e-192	0.785098	0.485	0.004	9.71052e-188	9	Cav1
2.37387e-191	0.504017	0.394	0.002	3.15226e-187	9	Pacsin3
5.45343e-190	0.548102	0.424	0.002	7.24161e-186	9	Tspan9
3.69991e-186	0.396331	0.303	0	4.91311e-182	9	Myh14
3.69991e-186	0.386213	0.303	0	4.91311e-182	9	Steap2
3.91024e-186	0.315588	0.303	0	5.19241e-182	9	Gm16136
4.87796e-186	0.383906	0.303	0	6.47744e-182	9	2610528J11Rik
5.75768e-186	0.353878	0.303	0	7.64563e-182	9	Cgn
7.78814e-185	0.822847	0.485	0.004	1.03419e-180	9	Cdh1
1.70168e-184	0.856133	0.273	0	2.25966e-180	9	Ang4
1.70168e-184	0.48455	0.273	0	2.25966e-180	9	Irx2
1.70168e-184	0.464198	0.273	0	2.25966e-180	9	Zfp979
1.70168e-184	0.459564	0.273	0	2.25966e-180	9	9230102O04Rik
1.70168e-184	0.372741	0.273	0	2.25966e-180	9	Serinc2
1.70168e-184	0.370211	0.273	0	2.25966e-180	9	Upk2
1.70168e-184	0.356518	0.273	0	2.25966e-180	9	Irx5
1.70168e-184	0.34189	0.273	0	2.25966e-180	9	Fermt1
1.70168e-184	0.338291	0.273	0	2.25966e-180	9	Grhl2
1.70168e-184	0.312983	0.273	0	2.25966e-180	9	Tspan1
1.70168e-184	0.302235	0.273	0	2.25966e-180	9	Ptk7
1.70168e-184	0.284105	0.273	0	2.25966e-180	9	Irs1
