# Supplementary material for: Tissue-resident macrophages promote extracellular matrix homeostasis in the mammary gland stroma of nulliparous mice
Source: eLife journal article supplement (doi:10.7554/elife.57438), 2020-06-01
Supplement: supp [file elife-57438-supp-v1.zip › elife_poa_e57438_Supplementary_file_3.xlsx]

## Sheet: gsea_Lyve1_genesets_DevFVBW10_v
Supplementary File 3: GSEA analysis using gene sets created from a differentially expressed ranked list from the bulk RNA-seq data (adjusted p-value < 0.1 and a foldchange >0.25) to determine enrichment of cluster 4.
ID	Description	setSize	enrichmentScore	NES	pvalue	p.adjust	qvalues	rank	leading_edge	core_enrichment
Lyve1pos_genes_down_set	Lyve1pos_genes_down_set	173	-0.775512	-2.08737	0.0015625	0.00263852	NA	1623	tags=45%, list=12%, signal=40%	Nfkbie/Syne1/Foxp4/Rasa2/Atp2a3/Plcg2/L1cam/Adora2a/Plcb2/St8sia6/Dennd4a/Il1b/Cadm1/Dusp5/Map3k14/Psd4/Odc1/Skil/Ccl5/Net1/Rab11fip1/Cd24a/Fam49a/Syngr2/Gpr65/Pik3r5/Dna2/Fam129a/Tmem123/Klrb1a/Svil/Rel/Gpr183/Adam8/Alkbh1/Actn1/Myo1g/Il1rl1/Traf1/Samsn1/Bcl2a1b/Rasal3/Cbfa2t3/Gpr132/Arl5c/Tnfaip3/Fam46c/Tbc1d1/Bcl2a1a/Dock8/Gramd1a/Galnt6/Ahcyl2/Arl4c/Itga6/Kif21b/Rin3/Tnip3/Cd5/Ciita/Rgs1/Ccr7…
Lyve1pos_genes_up_set	Lyve1pos_genes_up_set	190	0.956312	2.64206	0.00263852	0.00263852	NA	340	tags=58%, list=3%, signal=57%	Fcna/Cd209f/Cd209g/Lyve1/Folr2/Cbr2/C1qa/Ltc4s/C1qc/C1qb/Fcgrt/Gas6/Pf4/Ednrb/Apoe/Hal/Ccl24/Ccl8/Itm2b/Clec3b/F13a1/C4b/Wfdc17/Mrc1/Pla2g2d/Rnase4/Ctsb/Pmp22/Pltp/Maf/Grn/Serpinb6a/Cfh/Rcn3/Timd4/Calml4/Cd209d/Cd209b/Timp2/Igf1/Dab2/Clec10a/Stab1/Ifi27l2a/Selenbp1/Tcn2/Ly6e/Ctsl/Tns1/C6/Csf1r/Zfyve21/Enpep/Ctsd/Camk1/Mtss1/Pdgfc/Snx2/Igfbp4/Itsn1/Pepd/Glul/Frmd4b/Cd5l/Nrp1/Slco2b1/Cystm1/Npl/Col…
