# Supplementary material for: Tissue-resident macrophages promote extracellular matrix homeostasis in the mammary gland stroma of nulliparous mice
Source: eLife journal article supplement (doi:10.7554/elife.57438), 2020-06-01
Supplement: supp [file elife-57438-supp-v1.zip › elife_poa_e57438_Supplementary_file_4.xlsx]

## Sheet: Sheet1
Supplementary File 4: List of top gene sets identified by GSEA analysis including core enriched genes.
ID	Description	setSize	enrichmentScore	NES	pvalue	p.adjust	qvalues	rank	leading_edge	core_enrichment
GO_EXTRACELLULAR_MATRIX	GO_EXTRACELLULAR_MATRIX	230	0.800137	2.28064	0.00276243	0.0820477	0.0739615	805	tags=27%, list=6%, signal=26%	C1qa/C1qc/C1qb/Pf4/Apoe/Clec3b/F13a1/Ctsb/Serpinb6a/Timp2/Ctsl/Ctsd/Lgals1/Ctsc/Cfp/Colec12/Hpse/Tgfbi/Mmp9/Anxa5/Ctsh/Lgals3bp/Ang/Ctsz/Cstb/Serpinb1a/Anxa4/Adamtsl5/Fgf9/Fbln5/Cxcl12/Hsp90b1/Efemp2/Ecm1/Serpinb8/Aspn/Col3a1/Nid1/Adamts5/Ctss/Dcn/Mxra7/Ogn/Gpc3/Fbn1/Efemp1/Col1a2/Lgals9/Serping1/Rarres2/Sfrp2/Mmp2/Dpt/Ltbp4/S100a10/Htra1/Serpinf1/Pcolce/Abi3bp/Tgfb2/Postn/Mfap2
GO_COLLAGEN_CONTAINING_EXTRACELLULAR_MATRIX	GO_COLLAGEN_CONTAINING_EXTRACELLULAR_MATRIX	193	0.81303	2.26597	0.00261097	0.0820477	0.0739615	805	tags=31%, list=6%, signal=29%	C1qa/C1qc/C1qb/Pf4/Apoe/Clec3b/F13a1/Ctsb/Serpinb6a/Timp2/Ctsl/Ctsd/Lgals1/Ctsc/Cfp/Tgfbi/Mmp9/Anxa5/Ctsh/Lgals3bp/Ang/Ctsz/Cstb/Serpinb1a/Anxa4/Fgf9/Fbln5/Cxcl12/Hsp90b1/Efemp2/Ecm1/Serpinb8/Aspn/Col3a1/Nid1/Adamts5/Ctss/Dcn/Mxra7/Ogn/Gpc3/Fbn1/Efemp1/Col1a2/Lgals9/Serping1/Rarres2/Sfrp2/Mmp2/Dpt/Ltbp4/S100a10/Htra1/Serpinf1/Pcolce/Abi3bp/Tgfb2/Postn/Mfap2
GO_REGULATION_OF_SIGNALING_RECEPTOR_ACTIVITY	GO_REGULATION_OF_SIGNALING_RECEPTOR_ACTIVITY	231	0.711718	2.0308	0.00274725	0.0820477	0.0739615	637	tags=15%, list=5%, signal=15%	Gas6/Pf4/Ccl24/Ccl8/Grn/Igf1/Ccl6/Tslp/Ly6e/Pdgfc/Nrp1/Fcgr2b/Snx6/Ccl9/Kitl/Nenf/Mef2c/App/Lrpap1/Bmp2/Tnfsf12/Fgf9/Ncf1/Cxcl12/Gmfg/Anxa3/Il18bp/Fam3c/Ccl12/Ccl7/Ogn/Fbn1/Efemp1/Osgin1/Ccl2
GO_ENDOPLASMIC_RETICULUM_LUMEN	GO_ENDOPLASMIC_RETICULUM_LUMEN	188	0.731791	2.02109	0.00265252	0.0820477	0.0739615	615	tags=16%, list=5%, signal=15%	Gas6/Apoe/C4b/Rcn3/Cst3/Trf/Lgals1/Pdgfc/Igfbp4/Ctsc/Cfp/Cp/App/Hspa5/Aplp2/Ctsz/B2m/Lrpap1/Arsg/Eva1a/Pdia6/Hsp90b1/Col3a1/Qsox1/Adamts5/Foxred2/Dbi/Gpc3/Fbn1/Col1a2
GO_RECEPTOR_REGULATOR_ACTIVITY	GO_RECEPTOR_REGULATOR_ACTIVITY	180	0.732586	2.01768	0.0026455	0.0820477	0.0739615	637	tags=18%, list=5%, signal=17%	Gas6/Pf4/Ccl24/Ccl8/Grn/Igf1/Ccl6/Tslp/Ly6e/Pdgfc/Ccl9/Kitl/Nenf/App/Lrpap1/Bmp2/Tnfsf12/Fgf9/Cxcl12/Sema4a/Gmfg/Sema6d/Sema6a/Il18bp/Fam3c/Ccl12/Ccl7/Ogn/Fbn1/Efemp1/Osgin1/Ccl2
GO_RECEPTOR_MEDIATED_ENDOCYTOSIS	GO_RECEPTOR_MEDIATED_ENDOCYTOSIS	205	0.697204	1.97251	0.00257732	0.0820477	0.0739615	313	tags=14%, list=2%, signal=14%	Folr2/Apoe/Mrc1/Cd63/Dab2/Stab1/Trf/Cd5l/Fcer1g/Fcgr2b/Colec12/Cltc/Clta/Cd81/Cd36/Ophn1/Ap2m1/Pirb/Ap2s1/Ap2a2/Lgals3bp/Cd163/Cd9/Enpp1/Cd14/Sdcbp/B2m/Lrpap1/Tgfbr2
GO_AMIDE_BINDING	GO_AMIDE_BINDING	232	0.676057	1.93787	0.00271739	0.0820477	0.0739615	381	tags=12%, list=3%, signal=12%	Folr2/C1qa/Ednrb/Apoe/Itm2b/Pltp/Cd209b/Ctsl/Cst3/Enpep/Mgst1/Trem2/Fcgr2b/Clta/Cd36/Crip1/Ap2m1/Anxa5/Pirb/Col4a3bp/Ang/Tpp1/Cd14/Lrpap1/H2-D1/Npr1/H2-K1/Gstp1
GO_COLLAGEN_TRIMER	GO_COLLAGEN_TRIMER	34	0.944433	1.92962	0.00299401	0.0820477	0.0739615	121	tags=18%, list=1%, signal=18%	Fcna/C1qa/C1qc/C1qb/Colec12/C1qtnf1
GO_GLYCOSAMINOGLYCAN_BINDING	GO_GLYCOSAMINOGLYCAN_BINDING	105	0.769736	1.92208	0.00258398	0.0820477	0.0739615	577	tags=30%, list=4%, signal=29%	Lyve1/Pf4/Apoe/Ccl8/Clec3b/Pla2g2d/Cfh/Ccl6/Stab1/Trem2/Nrp1/Sulf2/Ccl9/Anxa5/Ighm/Hyal2/Fgfr1/App/Aplp2/Ang/Lrpap1/Anxa4/Adamtsl5/Tgfbr2/Fgf9/Adgrg1/Gns/Pcolce2/Adamts5/Dcn/Ccl12/Ccl7
