# Supplementary figures and images for: Tissue-resident macrophages promote extracellular matrix homeostasis in the mammary gland stroma of nulliparous mice
Source: eLife journal article supplement (doi:10.7554/elife.57438), 2020-06-01

Figure 1-figure supplement 1

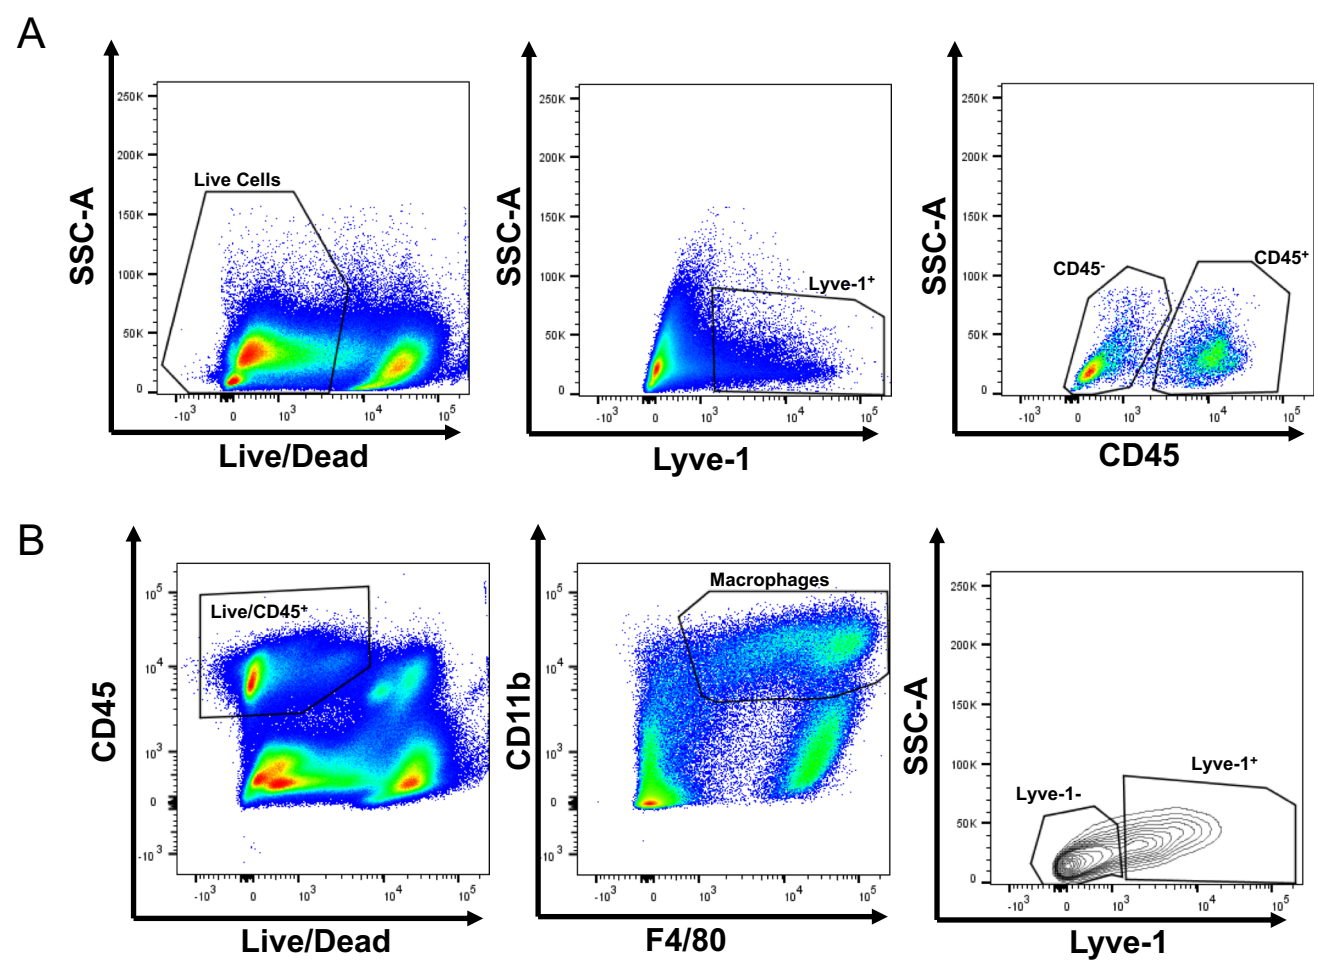

Supplement: supp [file elife-57438-supp-v1.zip › elife_poa_e57438_Figure_1_figure_supplement_1.pdf]

Figure 1-figure supplement 2

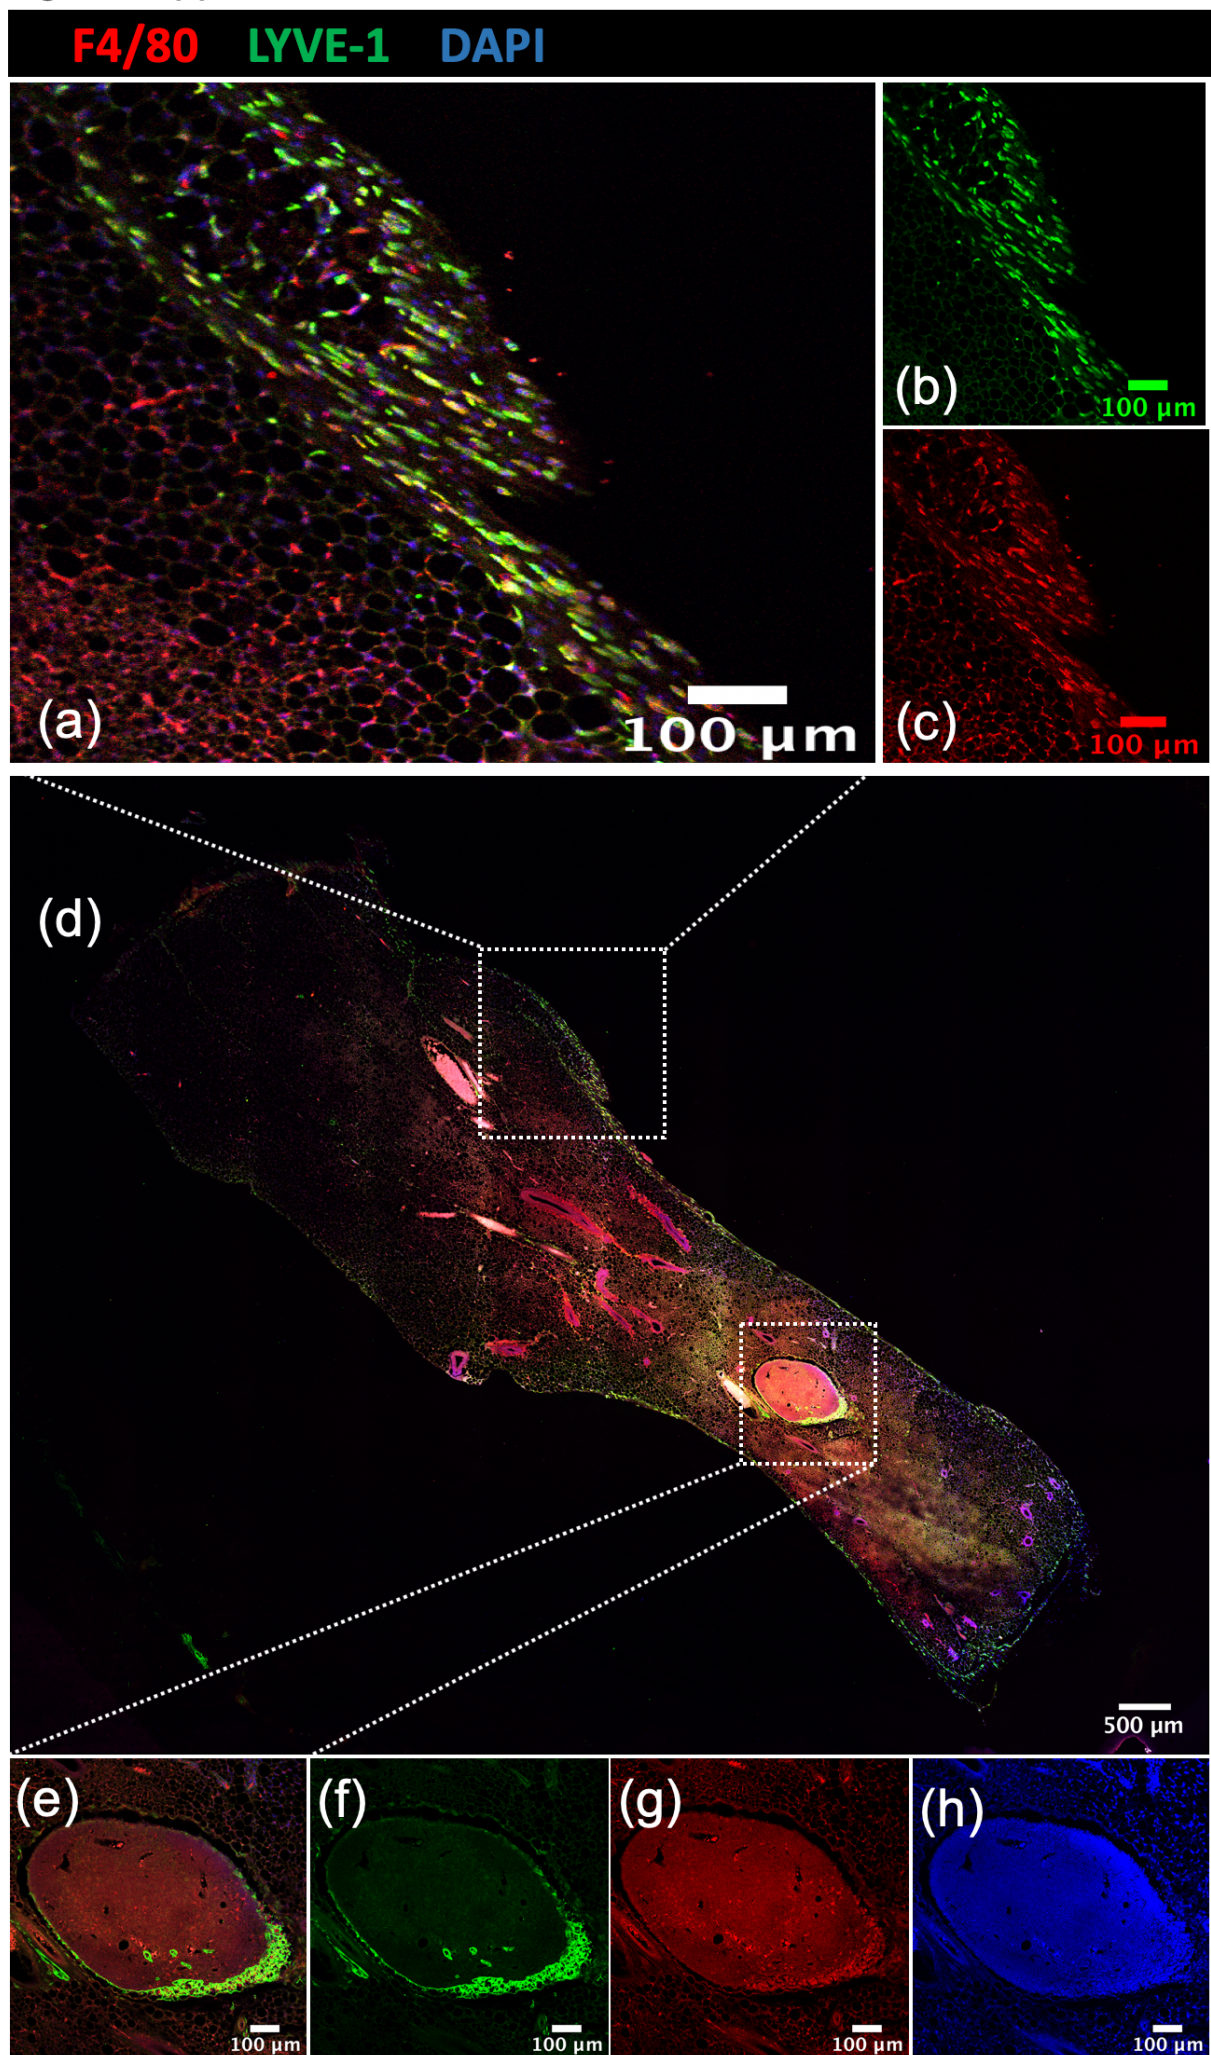

Supplement: supp [file elife-57438-supp-v1.zip › elife_poa_e57438_Figure_1_figure_supplement_2.pdf]

Figure 2-figure supplement 1

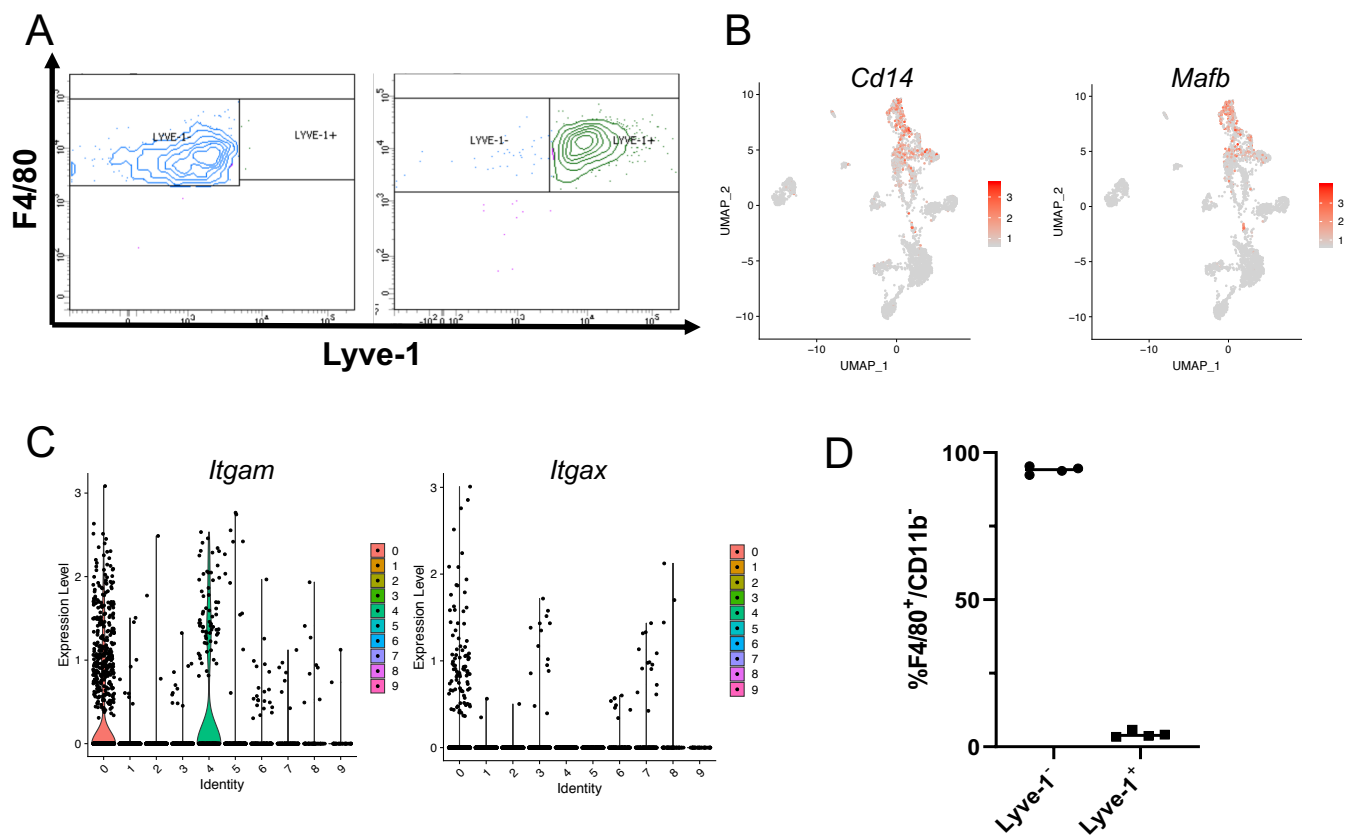

Supplement: supp [file elife-57438-supp-v1.zip › elife_poa_e57438_Figure_2_figure_supplement_1.pdf]

Figure 3-figure supplement 1

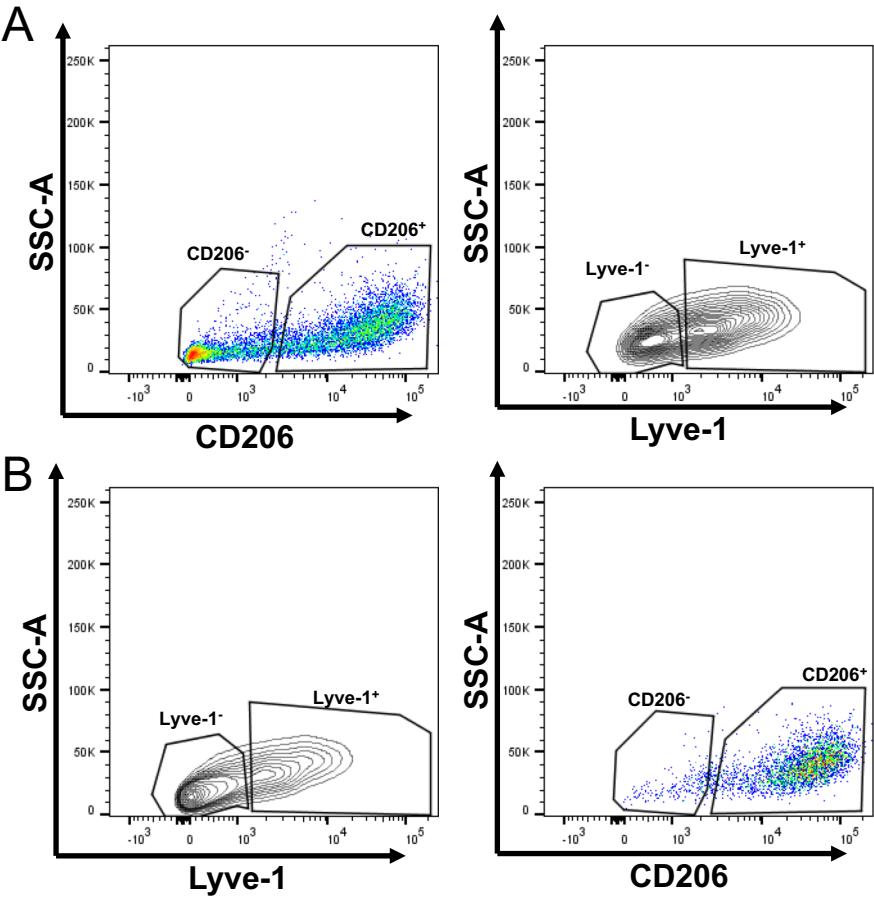

Supplement: supp [file elife-57438-supp-v1.zip › elife_poa_e57438_Figure_3_figure_supplement_1.pdf]

Figure 5-figure supplement 1

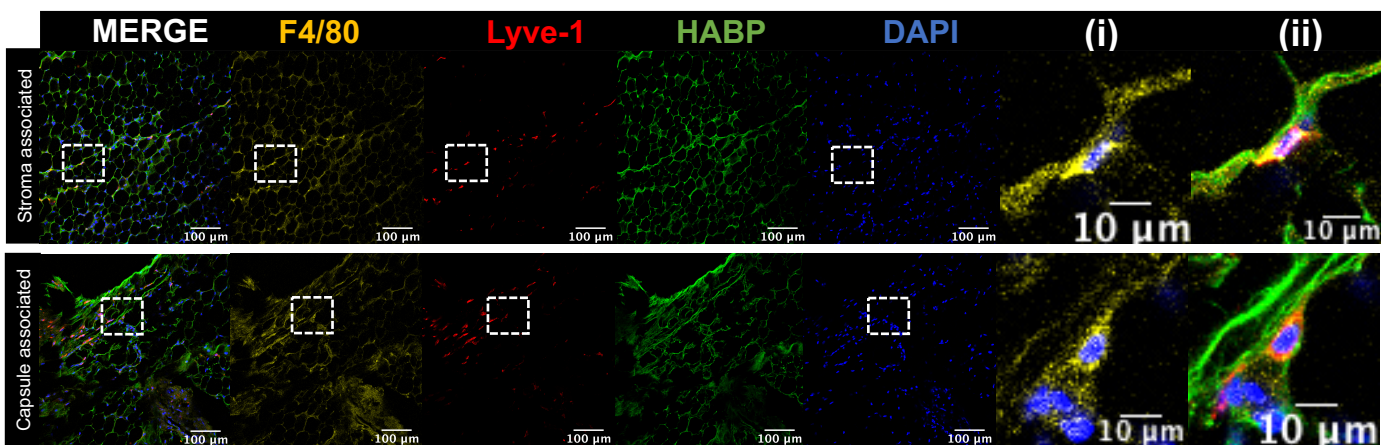

Supplement: supp [file elife-57438-supp-v1.zip › elife_poa_e57438_Figure_5_figure_supplement_1.pdf]

Figure 6-figure supplement 1

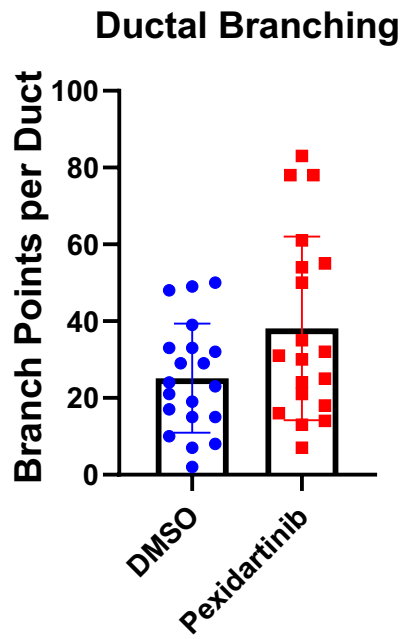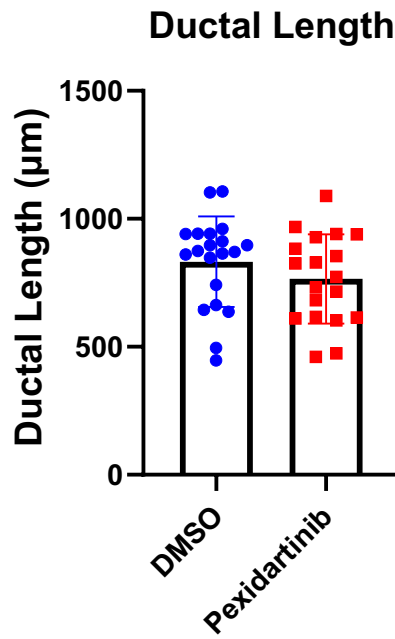

DMSO

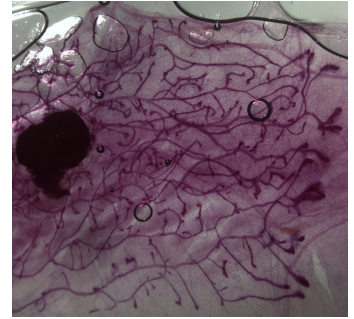

Pexidartinib

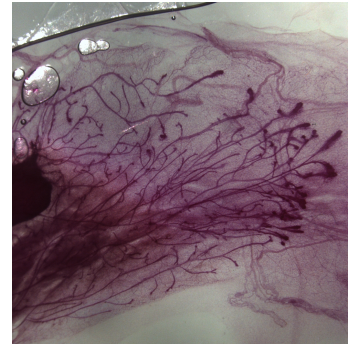

Supplement: supp [file elife-57438-supp-v1.zip › elife_poa_e57438_Figure_6_figure_supplement_1.pdf]
